# Supplementary material for: Theoretical insight into the on-water catalytic effect in the biogenesis of triterpene dimers: from one-step to two-step hetero Diels–Alder reactions
Source: Royal Society of Chemistry journal article supplement (doi:10.1039/d1nj04221a), 2021-01-01
Supplement: d1nj04221a1.pdf [file d1nj04221a1.pdf]

**Theoretical insights into on-water catalytic effect in the biogenesis of triterpene dimers: from one-step to two-step a hetero Diels-Alder reaction**

Mariana Quesadas-Rojas,<sup>a,b</sup> Gonzalo J. Mena-Rejon,<sup>c</sup> Carolina S. Castro-Segura,<sup>d</sup> David R. Cáceres-Castillo,<sup>c</sup> and Ramiro F. Quijano-Quiñones,<sup>\*e</sup>

*<sup>a</sup>Posgrado en Ciencias del Mar y Limnología, Universidad Nacional Autónoma de México; <sup>b</sup>Escuela Nacional de Educación Superior, Mérida, Universidad Nacional Autónoma de México; <sup>c</sup>Laboratorio de Química Farmacéutica, Facultad de Química, Universidad Autónoma de Yucatán; <sup>d</sup>Universidad Politécnica de Yucatán; <sup>e</sup>Laboratorio de Química Teórica, Facultad de Química, Universidad Autónoma de Yucatán.*

*\*ramiro.quijano@correo.uady.mx*

List of contents:

- Figure S1. Page 2
- Figure S2. Page 3
- Figure S3. Page 3
- Figure S4. Page 4
- Figure S5. Page 4
- Cartesian coordinates of the stationary points at levels of theory included in this study. Pages 5-22

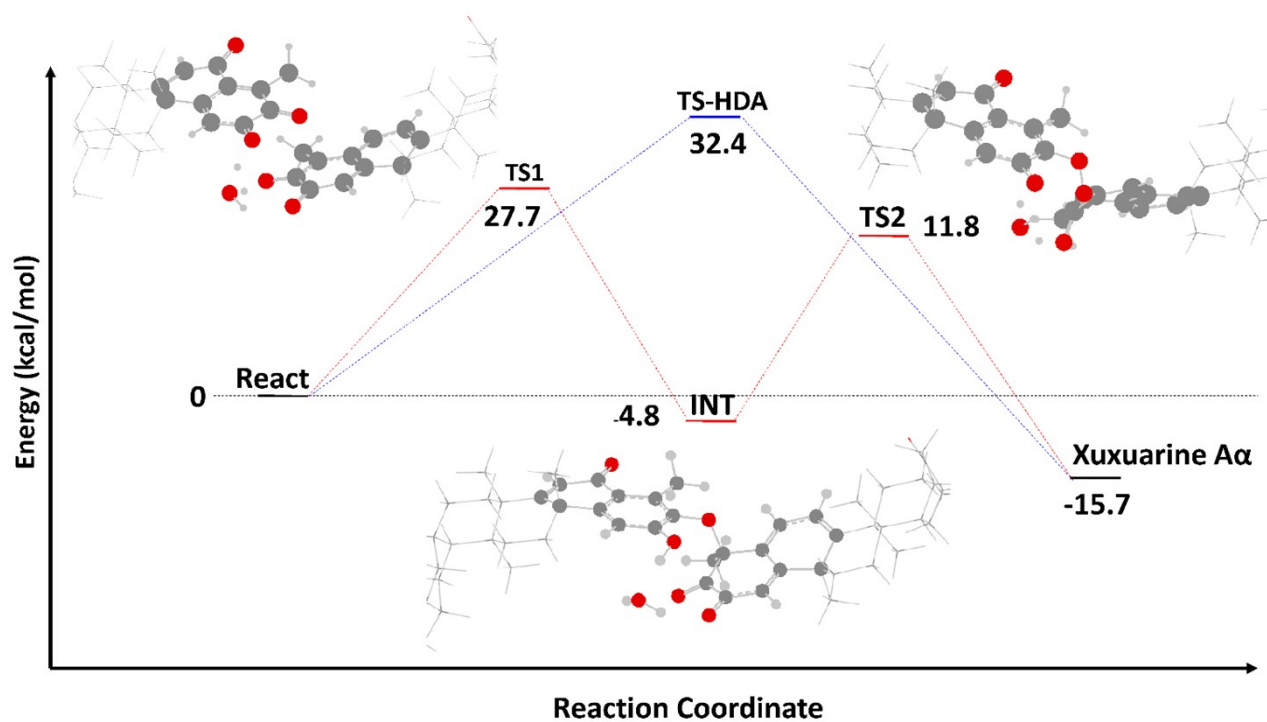

**Figure S1.** Energy profile of the two-step process with one water molecule (1-wt).

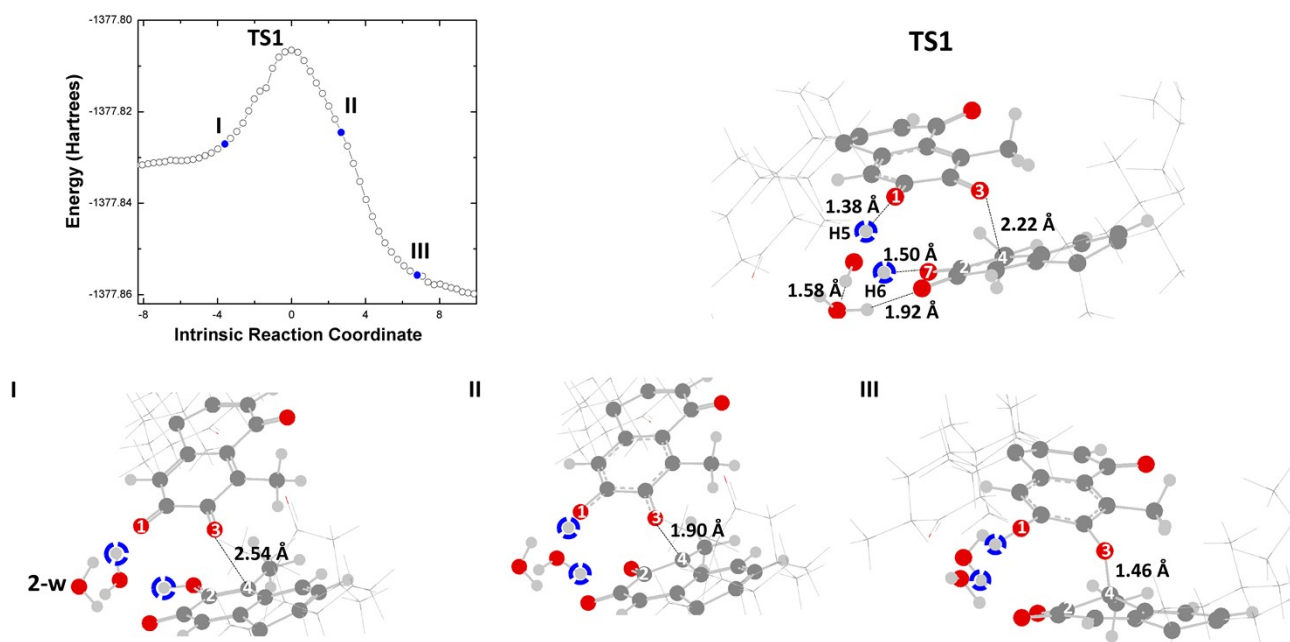

**Figure S2.** Reaction path calculated employing the IRC method in the first step of the 2-wt-a pathway, illustrating the two-process mechanisms for the first elemental step along with the selected bond distance. The blue circles point out what H atoms are being transferred.

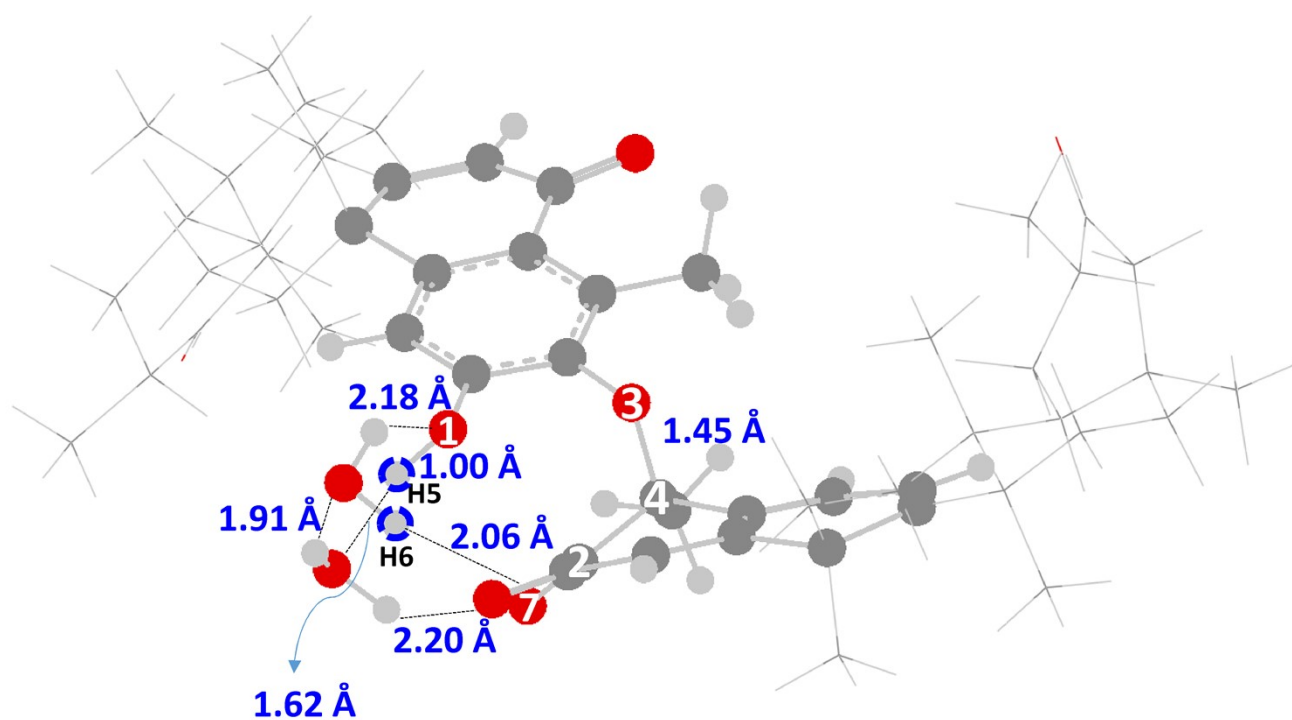

**Figure S3.** Structure of intermediate for the 2-wt-a pathway, showing the main interatomic distances. The blue circles point out what H atoms are being transferred.

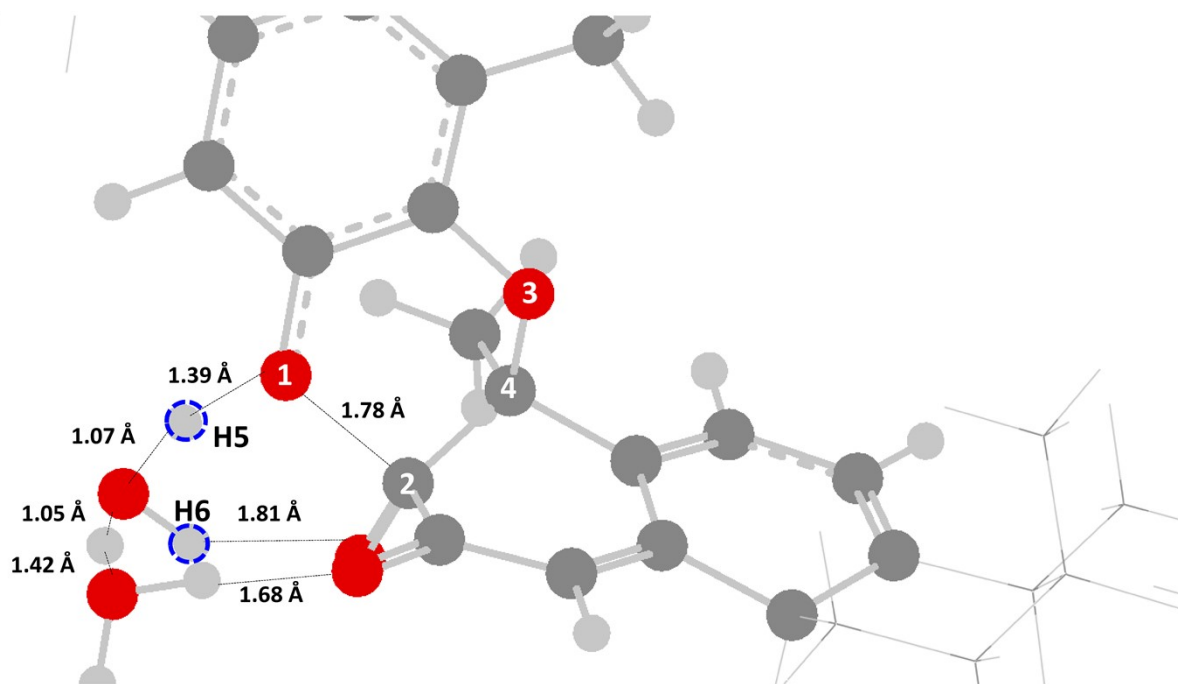

**Figure S4.** Structure of TS2 for the 2-wt-a pathway, showing the main interatomic distances. The blue circles point out what H atoms are being transferred.

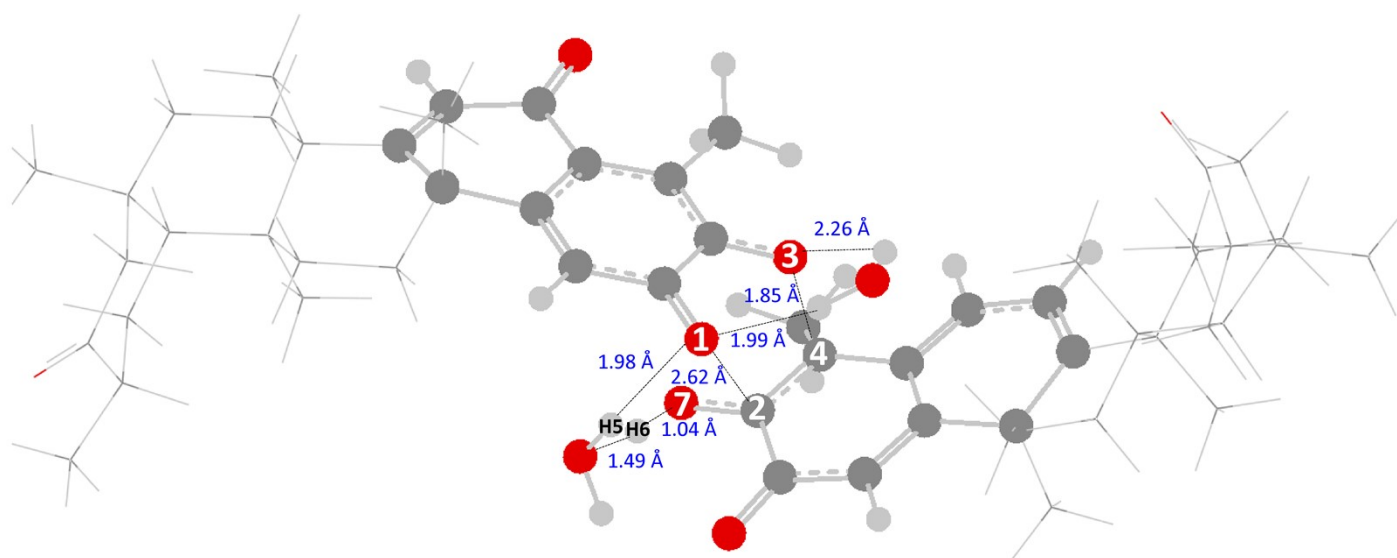

**Figure S5.** Structure of TS for the 2-wt-b pathway, showing the main interatomic distances.

# I. Reactives

## Orthoquinone

|   |   |             |             |             |        |        |  |
|---|---|-------------|-------------|-------------|--------|--------|--|
| O | 0 | -6.46166700 | 1.24340900  | -1.21677600 | H      |        |  |
| O | 0 | -5.14475400 | 3.16794600  | 0.15840600  | H      |        |  |
| C | 0 | -5.38303500 | 0.97612000  | -0.73431300 | H      |        |  |
| C | 0 | -4.62800700 | 2.07493100  | 0.03861800  | H      |        |  |
| C | 0 | -3.32514700 | 1.72841300  | 0.59262700  | H      |        |  |
| H | 0 | -2.82235400 | 2.51390500  | 1.14995800  | H      |        |  |
| C | 0 | -2.79930600 | 0.49556200  | 0.44243000  | H      |        |  |
| C | 0 | -3.53857300 | -0.56679600 | -0.28938500 | H      |        |  |
| C | 0 | -4.75662400 | -0.37200600 | -0.85931100 | H      |        |  |
| C | 0 | -5.55629200 | -1.38187400 | -1.62841100 | H      |        |  |
| H | 0 | -5.96218400 | -2.13940100 | -0.95396400 | H      |        |  |
| H | 0 | -4.93186700 | -1.91036800 | -2.34959400 | H      |        |  |
| H | 0 | -6.37747600 | -0.87836000 | -2.13566800 | H      |        |  |
| C | 0 | -1.45175700 | 0.14283500  | 1.13632400  | H      |        |  |
| C | 0 | -2.85501700 | -1.89185800 | -0.45126500 | H      |        |  |
| O | 0 | -3.46962200 | -2.90028300 | -0.76817500 | H      |        |  |
| C | 0 | -1.40557500 | -1.93573300 | -0.27241200 | H      |        |  |
| H | 0 | -0.93684100 | -2.82240600 | -0.68701500 | H      |        |  |
| C | 0 | -0.71006200 | -1.01546300 | 0.41733500  | H      |        |  |
| C | 0 | -0.59325800 | 1.41295900  | 1.22427800  | L H 14 | 0.0000 |  |
| H | 0 | -0.99252400 | 2.08208100  | 2.01669100  | L      |        |  |
| H | 0 | -0.68162700 | 1.99136900  | 0.27742100  | L      |        |  |
| C | 0 | 0.79147400  | -1.19846100 | 0.62667400  | L H 19 | 0.0000 |  |
| C | 0 | 0.88913000  | 1.16207200  | 1.50063600  | L      |        |  |
| H | 0 | 1.02963700  | 0.77538200  | 2.52882900  | L      |        |  |
| H | 0 | 1.43123400  | 2.13175100  | 1.47950100  | L      |        |  |
| C | 0 | 1.51532600  | 0.19103600  | 0.46840000  | L      |        |  |
| C | 0 | -1.84335000 | -0.34768200 | 2.53072700  | L H 14 | 0.0000 |  |
| H | 0 | -2.43430000 | 0.39873700  | 3.07883000  | L      |        |  |
| H | 0 | -0.95162100 | -0.55599900 | 3.14820200  | L      |        |  |
| H | 0 | -2.43529700 | -1.27146800 | 2.50196900  | L      |        |  |
| C | 0 | 1.42702200  | -2.17004100 | -0.40084100 | L      |        |  |
| H | 0 | 1.26847700  | -1.79173300 | -1.43025900 | L      |        |  |
| H | 0 | 0.91594900  | -3.15422900 | -0.36423800 | L      |        |  |
| C | 0 | 3.03483300  | 0.01443000  | 0.78487700  | L      |        |  |
| H | 0 | 3.07263500  | -0.33958600 | 1.85408800  | L      |        |  |
| C | 0 | 2.91894700  | -2.38232900 | -0.14014600 | L      |        |  |
| H | 0 | 3.04052900  | -2.95971000 | 0.80075400  | L      |        |  |
| H | 0 | 3.33531100  | -3.03925200 | -0.92961100 | L      |        |  |
| C | 0 | 3.76116400  | -1.08574600 | -0.04751400 | L      |        |  |
| C | 0 | 0.95128500  | -1.80623000 | 2.03550900  | L      |        |  |
| H | 0 | 0.52245700  | -1.16527500 | 2.82147900  | L      |        |  |
| H | 0 | 2.00805600  | -1.95792100 | 2.29257200  | L      |        |  |
| H | 0 | 0.46068100  | -2.78413800 | 2.10404900  | L      |        |  |
| C | 0 | 1.27005300  | 0.74248000  | -0.94576400 | L      |        |  |
| H | 0 | 1.71231200  | 1.74310100  | -1.06619100 | L      |        |  |
| H | 0 | 0.20432900  | 0.83320000  | -1.18281600 | L      |        |  |
| H | 0 | 1.71145200  | 0.09709600  | -1.72212300 | L      |        |  |
| C | 0 | 4.10108700  | -0.58847200 | -1.47329100 | L      |        |  |
| H | 0 | 3.15739600  | -0.46390400 | -2.05950100 | L      |        |  |
| H | 0 | 4.67805000  | -1.36093000 | -2.01948700 | L      |        |  |
| C | 0 | 3.83022500  | 1.33461900  | 0.75787900  | L      |        |  |
| H | 0 | 3.24461800  | 2.13212700  | 1.26477800  | L      |        |  |
| H | 0 | 4.74233000  | 1.20931700  | 1.37805100  | L      |        |  |
| C | 0 | 4.84667500  | 0.71809900  | -1.46328400 | L      |        |  |
| C | 0 | 4.23405700  | 1.83791300  | -0.63741800 | L      |        |  |
| H | 0 | 3.29557400  | 2.15562400  | -1.18286400 | L      |        |  |
| C | 0 | 5.08806800  | -1.45036600 | 0.65759900  | L      |        |  |
| H | 0 | 5.77035400  | -0.59604300 | 0.72088100  | L      |        |  |
| H | 0 | 5.61939100  | -2.24769200 | 0.12618000  | L      |        |  |
| H | 0 | 4.92227300  | -1.80225900 | 1.68200300  | L      |        |  |
| O | 0 | 5.85990000  | 0.86444700  | -2.12672000 | L      |        |  |
| C | 0 | 5.16618900  | 3.04291800  | -0.53495400 | L      |        |  |
| H | 0 | 4.67775300  | 3.88447000  | -0.02937500 | L      |        |  |
| H | 0 | 5.47841700  | 3.39044500  | -1.52789200 | L      |        |  |
| H | 0 | 6.07883300  | 2.80993100  | 0.02685200  | L      |        |  |

Gibbs Free Energy = -649.037555 hartrees

## Quinonemethide triterpenoid

|   |   |             |             |             |        |        |  |
|---|---|-------------|-------------|-------------|--------|--------|--|
| C | 0 | -3.57336900 | 1.45021800  | 0.62190000  | H      |        |  |
| C | 0 | -5.53475000 | 0.57108700  | -0.65061100 | H      |        |  |
| C | 0 | -3.51551300 | -0.73468800 | -0.45361500 | H      |        |  |
| C | 0 | -4.88050500 | -0.57895000 | -0.93580800 | H      |        |  |
| C | 0 | -2.89205200 | 0.30561100  | 0.35864500  | H      |        |  |
| C | 0 | -4.91919700 | 1.65537600  | 0.13121200  | H      |        |  |
| H | 0 | -3.15092600 | 2.24890600  | 1.22478200  | H      |        |  |
| O | 0 | -5.58664700 | 2.67982500  | 0.33429100  | H      |        |  |
| C | 0 | -2.76561000 | -1.82074500 | -0.80444000 | H      |        |  |
| H | 0 | -3.21259000 | -2.59529000 | -1.41926000 | H      |        |  |
| C | 0 | -1.51990100 | 0.02059000  | 1.02280900  | H      |        |  |
| C | 0 | -0.71943900 | -1.10048500 | 0.32148100  | H      |        |  |
| C | 0 | -1.37460200 | -1.97172300 | -0.47785300 | H      |        |  |
| H | 0 | -0.86039200 | -2.81491000 | -0.92653900 | H      |        |  |
| C | 0 | -1.89420200 | -0.48573300 | 2.42230000  | L H 11 | 0.0000 |  |
| H | 0 | -2.55425200 | 0.21539900  | 2.94995900  | L      |        |  |
| H | 0 | -1.00045400 | -0.61085500 | 3.05709200  | L      |        |  |
| H | 0 | -2.40729900 | -1.45532500 | 2.38903600  | L      |        |  |
| C | 0 | -0.71916000 | 1.32818300  | 1.11356100  | L H 11 | 0.0000 |  |
| H | 0 | -1.16230200 | 1.98691200  | 1.89011200  | L      |        |  |
| H | 0 | -0.82137100 | 1.89067000  | 0.16006700  | L      |        |  |
| C | 0 | 0.76699500  | 1.13565700  | 1.42153200  | L      |        |  |
| H | 0 | 0.89801900  | 0.78050700  | 2.46257100  | L      |        |  |
| C | 0 | 1.27578200  | 2.12228600  | 1.38455100  | L      |        |  |
| C | 0 | 0.77157500  | -1.25374500 | 0.60085500  | L H 12 | 0.0000 |  |
| C | 0 | 1.45426600  | 0.15846300  | 0.43326600  | L      |        |  |
| C | 0 | 1.47001500  | -2.22752700 | -0.38303500 | L      |        |  |
| H | 0 | 0.98868200  | -3.22560900 | -0.33786100 | L      |        |  |
| H | 0 | 1.33586000  | -1.87787400 | -1.42601800 | L      |        |  |
| C | 0 | 2.96870400  | 0.03832000  | 0.79717100  | L      |        |  |
| H | 0 | 2.98659700  | -0.28686600 | 1.87546200  | L      |        |  |
| C | 0 | 3.75379700  | -1.05778300 | 0.01376100  | L      |        |  |
| C | 0 | 2.95872600  | -2.38428400 | -0.06944200 | L      |        |  |
| H | 0 | 3.06746500  | -2.93071100 | 0.89166300  | L      |        |  |
| H | 0 | 3.42176900  | -3.04816400 | -0.82610900 | L      |        |  |
| C | 0 | 0.90887100  | -1.82963900 | 2.02395600  | L      |        |  |
| H | 0 | 0.49727200  | -1.15505700 | 2.79080500  | L      |        |  |
| H | 0 | 1.95875500  | -2.00863800 | 2.29045200  | L      |        |  |
| H | 0 | 0.38663100  | -2.78925900 | 2.11400100  | L      |        |  |
| C | 0 | 1.23400000  | 0.67145800  | -0.99969000 | L      |        |  |
| H | 0 | 0.17270900  | 0.73200600  | -1.26473200 | L      |        |  |
| H | 0 | 1.70983400  | 0.01851000  | -1.74865200 | L      |        |  |
| H | 0 | 1.65568800  | 1.67925500  | -1.13202200 | L      |        |  |
| C | 0 | 4.11631300  | -0.58526100 | -1.41486600 | L      |        |  |
| C | 0 | 3.18478700  | -0.50398200 | -2.02754300 | L      |        |  |
| H | 0 | 4.73010600  | -1.35281000 | -1.92661500 | L      |        |  |
| C | 0 | 3.72407700  | 1.38196000  | 0.75883700  | L      |        |  |
| H | 0 | 3.09922000  | 2.17295300  | 1.22742900  | L      |        |  |
| H | 0 | 4.62043600  | 1.30066700  | 1.40852500  | L      |        |  |
| C | 0 | 4.15468400  | 1.86339000  | -0.63628700 | L      |        |  |
| C | 0 | 4.82169600  | 0.74316500  | -1.41818200 | L      |        |  |
| C | 0 | 5.07173300  | -1.36011100 | 0.76389200  | L      |        |  |
| H | 0 | 4.88845600  | -1.69121000 | 1.79222700  | L      |        |  |
| H | 0 | 5.72388300  | -0.48235400 | 0.82331200  | L      |        |  |
| H | 0 | 5.64316900  | -2.15268300 | 0.26827000  | L      |        |  |
| C | 0 | 5.05006400  | 3.09632300  | -0.53703000 | L      |        |  |
| H | 0 | 4.52593100  | 3.93411100  | -0.06202100 | L      |        |  |
| H | 0 | 5.37744800  | 3.43141400  | -1.52939800 | L      |        |  |
| H | 0 | 5.95447600  | 2.90081900  | 0.05161000  | L      |        |  |
| H | 0 | 3.22368300  | 2.14129600  | -1.21538200 | L      |        |  |
| O | 0 | 5.84678000  | 0.90444900  | -2.05977100 | L      |        |  |
| O | 0 | -6.79817000 | 0.82881000  | -1.05943400 | H      |        |  |
| H | 0 | -6.99151300 | 1.72000100  | -0.71366500 | H      |        |  |
| C | 0 | -5.53926700 | -1.65949500 | -1.74790000 | H      |        |  |
| H | 0 | -6.57274300 | -1.38985700 | -1.96325100 | H      |        |  |
| H | 0 | -5.53558700 | -2.61361600 | -1.21254700 | H      |        |  |
| H | 0 | -5.02061900 | -1.81312200 | -2.69950500 | H      |        |  |

Gibbs Free Energy = -575.046595 Hartrees

## Water

|   |            |             |             |
|---|------------|-------------|-------------|
| O | 0.00000000 | 0.00000000  | 0.11903300  |
| H | 0.00000000 | 0.75736500  | -0.47613100 |
| H | 0.00000000 | -0.75736500 | -0.47613100 |

Gibbs Free Energy = -76.387377 Hartrees

## II. One-water Case

### TS1

|   |   |             |             |             |        |        |
|---|---|-------------|-------------|-------------|--------|--------|
| C | 0 | 2.38824500  | 2.60618100  | -0.95194300 | H      |        |
| C | 0 | 0.41418700  | 2.20854300  | 0.49207200  | H      |        |
| C | 0 | 2.65476000  | 1.84030000  | 1.37331400  | H      |        |
| C | 0 | 1.20274300  | 1.83404900  | 1.61332300  | H      |        |
| C | 0 | 3.19194800  | 2.17383500  | 0.05697700  | H      |        |
| C | 0 | 0.95779700  | 2.70406700  | -0.79131700 | H      |        |
| H | 0 | 2.79331700  | 2.89825300  | -1.91624500 | H      |        |
| O | 0 | 0.15404500  | 3.17116100  | -1.59980400 | H      |        |
| C | 0 | 3.50107800  | 1.42134600  | 2.35211000  | H      |        |
| H | 0 | 3.09707900  | 1.16666900  | 3.32588100  | H      |        |
| C | 0 | 4.73296200  | 2.16902000  | -0.14414600 | H      |        |
| C | 0 | 5.50824700  | 1.42354000  | 0.96551200  | H      |        |
| C | 0 | 4.90128700  | 1.17086200  | 2.14549300  | H      |        |
| H | 0 | 5.43871800  | 0.71711800  | 2.97063900  | H      |        |
| C | 0 | 5.11822100  | 3.65125600  | -0.07728300 | L H 11 | 0.0000 |
| H | 0 | 4.52341000  | 4.26635500  | -0.76528400 | L      |        |
| H | 0 | 6.17284600  | 3.80785100  | -0.36201500 | L      |        |
| H | 0 | 4.98824200  | 4.06762000  | 0.92966700  | L      |        |
| O | 0 | -0.88707800 | 2.28622300  | 0.64719200  | H      |        |
| H | 0 | -1.24416300 | 2.59376400  | -0.21565900 | H      |        |
| C | 0 | 0.64118200  | 2.19708300  | 2.96839800  | H      |        |
| H | 0 | -0.40924000 | 1.90335400  | 3.02353500  | H      |        |
| H | 0 | 0.70935100  | 3.27850700  | 3.11472000  | H      |        |
| H | 0 | 1.18347600  | 1.69937700  | 3.77064700  | H      |        |
| O | 0 | 0.88152100  | -0.02151800 | 1.75692000  | H      |        |
| O | 0 | 0.39111900  | 0.25726900  | -0.75151600 | H      |        |
| C | 0 | -0.27723400 | -0.41849700 | 1.35901100  | H      |        |
| C | 0 | -0.52928000 | -0.27246600 | -0.06389300 | H      |        |
| C | 0 | -1.82843100 | -0.59215800 | -0.55916600 | H      |        |
| H | 0 | -2.00101500 | -0.46587800 | -1.62498300 | H      |        |
| C | 0 | -2.79374900 | -1.09194100 | 0.27567900  | H      |        |
| C | 0 | -2.51834300 | -1.25451900 | 1.68367500  | H      |        |
| C | 0 | -1.30314000 | -0.87886900 | 2.24419600  | H      |        |
| C | 0 | -0.96000600 | -0.97354800 | 3.70706000  | H      |        |
| H | 0 | -0.92505200 | -2.01512200 | 4.03131300  | H      |        |
| H | 0 | -1.72013600 | -0.48511600 | 4.31939000  | H      |        |
| H | 0 | 0.01016700  | -0.50962900 | 3.88052800  | H      |        |
| C | 0 | -4.14368700 | -1.55999200 | -0.33959100 | H      |        |
| C | 0 | -3.60450800 | -1.78582800 | 2.55185400  | H      |        |
| O | 0 | -3.40966100 | -2.15967500 | 3.70423300  | H      |        |
| C | 0 | -4.96684400 | -1.80605000 | 2.01382700  | H      |        |
| H | 0 | -5.72625200 | -1.97626400 | 2.77047300  | H      |        |
| C | 0 | -5.27220400 | -1.66488200 | 0.71350500  | H      |        |
| C | 0 | -3.86598800 | -2.96449400 | -0.87966600 | L H 38 | 0.0000 |
| H | 0 | -3.00608800 | -2.97955000 | -1.56258600 | L      |        |
| H | 0 | -4.72489600 | -3.35508900 | -1.45216200 | L      |        |
| H | 0 | -3.65629800 | -3.68436900 | -0.07855500 | L      |        |
| C | 0 | -4.52423900 | -0.60212900 | -1.48002700 | L H 38 | 0.0000 |
| H | 0 | -3.86699500 | -0.78388000 | -2.35713300 | L      |        |
| H | 0 | -4.31586400 | 0.44529400  | -1.16994900 | L      |        |
| C | 0 | -5.98160200 | -0.70215300 | -1.93246000 | L      |        |
| H | 0 | -6.17564000 | 0.07150900  | -2.70555000 | L      |        |
| H | 0 | -6.15982900 | -1.67047300 | -2.43993900 | L      |        |
| C | 0 | -6.97380100 | -0.52307400 | -0.75537800 | L      |        |

|   |   |              |             |             |        |        |
|---|---|--------------|-------------|-------------|--------|--------|
| C | 0 | -6.72985900  | -1.70603400 | 0.25746600  | L H 43 | 0.0000 |
| C | 0 | -7.73272800  | -1.52786700 | 1.42679700  | L      |        |
| H | 0 | -7.55120500  | -0.56297800 | 1.94065900  | L      |        |
| H | 0 | -7.56655500  | -2.31136100 | 2.19411600  | L      |        |
| C | 0 | -9.18440100  | -1.60543000 | 0.95161000  | L      |        |
| H | 0 | -9.85878500  | -1.42492400 | 1.81195600  | L      |        |
| H | 0 | -9.40287700  | -2.64712400 | 0.63354100  | L      |        |
| C | 0 | -8.43650200  | -0.60760000 | -1.29749900 | L      |        |
| H | 0 | -8.49783300  | -1.60184500 | -1.82338200 | L      |        |
| C | 0 | -9.54746800  | -0.64028200 | -0.20399400 | L      |        |
| C | 0 | -9.82089700  | 0.77057900  | 0.37013600  | L      |        |
| H | 0 | -8.93782100  | 1.10713400  | 0.96787200  | L      |        |
| H | 0 | -10.65821800 | 0.73274000  | 1.09458800  | L      |        |
| C | 0 | -9.09401700  | 1.85422600  | -1.84473800 | L      |        |
| H | 0 | -8.14982300  | 2.29876000  | -1.40879900 | L      |        |
| C | 0 | -8.76138000  | 0.44892700  | -2.37228500 | L      |        |
| H | 0 | -9.61124700  | 0.07966800  | -2.98362200 | L      |        |
| H | 0 | -7.90961000  | 0.53121900  | -3.08181800 | L      |        |
| C | 0 | -10.85859100 | -1.15835000 | -0.83902500 | L      |        |
| H | 0 | -10.73284800 | -2.15388800 | -1.27912200 | L      |        |
| H | 0 | -11.21876400 | -0.50010200 | -1.63697100 | L      |        |
| H | 0 | -11.66162900 | -1.23418500 | -0.09771400 | L      |        |
| C | 0 | -9.58038500  | 2.75925400  | -2.97447600 | L      |        |
| H | 0 | -8.82745400  | 2.84995300  | -3.76658500 | L      |        |
| H | 0 | -9.79824600  | 3.77090700  | -2.61095700 | L      |        |
| H | 0 | -10.49928900 | 2.37856400  | -3.43707100 | L      |        |
| C | 0 | -10.09737700 | 1.78619000  | -0.70439800 | L      |        |
| O | 0 | -11.05362700 | 2.53917200  | -0.62061200 | L      |        |
| C | 0 | -6.68087400  | 0.81831200  | -0.06236000 | L      |        |
| H | 0 | -5.66416400  | 0.86870900  | 0.34210100  | L      |        |
| H | 0 | -7.36534000  | 1.00481000  | 0.78065700  | L      |        |
| C | 0 | -6.79010300  | 1.66081200  | -0.76196900 | L      |        |
| C | 0 | -6.96130000  | -3.09680000 | -0.36558200 | L      |        |
| H | 0 | -6.32879600  | -3.27182200 | -1.24988000 | L      |        |
| H | 0 | -8.00181800  | -3.22741000 | -0.69089000 | L      |        |
| H | 0 | -6.74875500  | -3.89406600 | 0.35593000  | L      |        |
| C | 0 | 5.03921700   | 1.57105100  | -1.52330300 | L H 11 | 0.0000 |
| H | 0 | 4.70053500   | 2.26109000  | -2.32280800 | L      |        |
| H | 0 | 4.43446100   | 0.64091100  | -1.64693100 | L      |        |
| C | 0 | 6.51645400   | 1.23873200  | -1.74411200 | L      |        |
| H | 0 | 7.11794000   | 2.16704700  | -1.78945600 | L      |        |
| H | 0 | 6.63086600   | 0.76503000  | -2.74169900 | L      |        |
| C | 0 | 7.07387500   | 0.29174400  | -0.64830400 | L      |        |
| C | 0 | 6.96787800   | 1.04376400  | 0.73361400  | L H 12 | 0.0000 |
| C | 0 | 6.21782100   | -0.98608000 | -0.62530600 | L      |        |
| H | 0 | 6.33450400   | -1.56151800 | -1.54907200 | L      |        |
| H | 0 | 5.14412000   | -0.75879300 | -0.52478000 | L      |        |
| H | 0 | 6.48031900   | -1.64559100 | 0.21276900  | L      |        |
| C | 0 | 7.79251000   | 2.34547600  | 0.77835500  | L      |        |
| H | 0 | 8.87047000   | 2.14609600  | 0.71304300  | L      |        |
| H | 0 | 7.62415900   | 2.88836500  | 1.71571300  | L      |        |
| H | 0 | 7.54658800   | 3.02696700  | -0.05077100 | L      |        |
| C | 0 | 7.52211500   | 0.09209600  | 1.82509400  | L      |        |
| H | 0 | 6.91432300   | -0.83449600 | 1.86629600  | L      |        |
| H | 0 | 7.42758500   | 0.56037900  | 2.82537200  | L      |        |
| C | 0 | 8.99081400   | -0.25462400 | 1.57721200  | L      |        |
| H | 0 | 9.60577400   | 0.65801000  | 1.73011700  | L      |        |
| H | 0 | 9.33546700   | -0.96401600 | 2.35519500  | L      |        |
| C | 0 | 8.57485700   | -0.03328900 | -0.95177200 | L      |        |
| H | 0 | 9.09781500   | 0.95945200  | -0.99768100 | L      |        |
| C | 0 | 9.29581200   | -0.83866500 | 0.17305200  | L      |        |
| C | 0 | 10.82512200  | -0.72694000 | -0.02582000 | L      |        |
| H | 0 | 11.37375800  | -1.22191000 | 0.78294600  | L      |        |
| H | 0 | 11.15663900  | 0.31665600  | -0.05131200 | L      |        |
| H | 0 | 11.15549400  | -1.19000300 | -0.96639200 | L      |        |
| C | 0 | 8.74362100   | -0.67640400 | -2.34894200 | L      |        |
| H | 0 | 9.41259200   | -0.03475900 | -2.95736100 | L      |        |
| H | 0 | 7.77245500   | -0.66297700 | -2.89069500 | L      |        |
| C | 0 | 9.30653300   | -2.10844400 | -2.37291900 | L      |        |
| H | 0 | 10.42070300  | -2.05136800 | -2.18766500 | L      |        |
| C | 0 | 8.89070300   | -2.33160900 | 0.15145700  | L      |        |
| H | 0 | 9.62941700   | -2.93894000 | 0.71722400  | L      |        |
| H | 0 | 7.93629900   | -2.46807100 | 0.71322600  | L      |        |
| C | 0 | 8.72580900   | -2.91343700 | -1.22478800 | L      |        |
| O | 0 | 8.16942600   | -3.98894600 | -1.37927700 | L      |        |
| C | 0 | 9.07222200   | -2.77597800 | -3.72478600 | L      |        |
| H | 0 | 9.52252000   | -3.77565800 | -3.75937700 | L      |        |
| H | 0 | 9.51045900   | -2.18960800 | -4.54135900 | L      |        |



|   |   |            |             |             |   |
|---|---|------------|-------------|-------------|---|
| H | 0 | 8.00385500 | -2.89635200 | -3.94232200 | L |
| H | 0 | 2.97745700 | -0.75294800 | 0.77705600  | H |
| O | 0 | 3.01278000 | -0.77861800 | -0.18687500 | H |
| H | 0 | 2.15617200 | -0.37941500 | -0.41988300 | H |

Gibbs Free Energy = -1300.415956 Hartrees

### Intermediate

|   |   |             |             |             |        |        |
|---|---|-------------|-------------|-------------|--------|--------|
| C | 0 | -2.99091400 | 2.57217600  | -0.09611600 | H      |        |
| C | 0 | -0.64769200 | 1.84194500  | -0.74361300 | H      |        |
| C | 0 | -2.70702700 | 0.48687300  | -1.37870900 | H      |        |
| C | 0 | -1.19024100 | 0.51591700  | -1.30585400 | H      |        |
| C | 0 | -3.52681900 | 1.54219600  | -0.81342200 | H      |        |
| C | 0 | -1.57291400 | 2.76145500  | 0.06050500  | H      |        |
| H | 0 | -3.61893200 | 3.32949700  | 0.36457400  | H      |        |
| O | 0 | -1.07549700 | 3.66264500  | 0.72756300  | H      |        |
| C | 0 | -3.30847400 | -0.62763600 | -1.85954700 | H      |        |
| H | 0 | -2.68938500 | -1.44484200 | -2.21733600 | H      |        |
| C | 0 | -5.04864000 | 1.52771800  | -1.13408100 | H      |        |
| C | 0 | -5.59672300 | 0.11757800  | -1.45813500 | H      |        |
| C | 0 | -4.73432900 | -0.84413100 | -1.84296900 | H      |        |
| H | 0 | -5.08181000 | -1.82572100 | -2.14480000 | H      |        |
| C | 0 | -5.13271000 | 2.37091600  | -2.41294800 | L H 11 | 0.0000 |
| H | 0 | -4.67621700 | 3.36172400  | -2.28603200 | L      |        |
| H | 0 | -6.18210600 | 2.54727700  | -2.70702600 | L      |        |
| H | 0 | -4.63605600 | 1.88788000  | -3.26432800 | L      |        |
| O | 0 | 0.49277600  | 2.18943700  | -0.94877100 | H      |        |
| H | 0 | 2.08621200  | 2.88789600  | 0.96726600  | H      |        |
| C | 0 | -0.54134600 | 0.29365300  | -2.66984900 | H      |        |
| H | 0 | 0.54328200  | 0.24516300  | -2.55576400 | H      |        |
| H | 0 | -0.78442000 | 1.12900300  | -3.33037300 | H      |        |
| H | 0 | -0.90156100 | -0.62788800 | -3.12592800 | H      |        |
| O | 0 | -0.86331800 | -0.55887300 | -0.38013600 | H      |        |
| O | 0 | 0.05327400  | 0.89766400  | 1.64838600  | H      |        |
| C | 0 | 0.45754800  | -0.72227300 | -0.01595200 | H      |        |
| C | 0 | 0.92832700  | 0.06090800  | 1.05046900  | H      |        |
| C | 0 | 2.25410600  | -0.04352600 | 1.44786400  | H      |        |
| H | 0 | 2.59723800  | 0.57337500  | 2.27567600  | H      |        |
| C | 0 | 3.12034500  | -0.93456100 | 0.81378200  | H      |        |
| C | 0 | 2.62289200  | -1.76919000 | -0.20258300 | H      |        |
| C | 0 | 1.26877600  | -1.68062100 | -0.61874200 | H      |        |
| C | 0 | 0.66216800  | -2.58878500 | -1.65939200 | H      |        |
| H | 0 | 0.81678600  | -3.63239900 | -1.38713300 | H      |        |
| H | 0 | 1.13395000  | -2.44910200 | -2.63500400 | H      |        |
| H | 0 | -0.40523100 | -2.39115700 | -1.74182800 | H      |        |
| C | 0 | 4.57211400  | -1.04512400 | 1.35126800  | H      |        |
| C | 0 | 3.56004000  | -2.71054900 | -0.86558400 | H      |        |
| O | 0 | 3.19975400  | -3.57141600 | -1.66409300 | H      |        |
| C | 0 | 4.99392000  | -2.55789300 | -0.59451200 | H      |        |
| H | 0 | 5.61701400  | -3.15006300 | -1.25715600 | H      |        |
| C | 0 | 5.51101900  | -1.77933700 | 0.36929200  | H      |        |
| C | 0 | 4.45908200  | -1.88217200 | 2.62788700  | L H 38 | 0.0000 |
| H | 0 | 3.71071000  | -1.47790600 | 3.32211000  | L      |        |
| H | 0 | 5.41327800  | -1.90896000 | 3.18122100  | L      |        |
| H | 0 | 4.17781600  | -2.92199700 | 2.41808500  | L      |        |
| H | 0 | 0.71441400  | 3.53048700  | 1.18132600  | H      |        |
| O | 0 | 1.46791200  | 3.13860000  | 1.66597700  | H      |        |
| H | 0 | 0.55637000  | 1.70401200  | 1.92755800  | H      |        |
| C | 0 | 5.09107300  | 0.36684100  | 1.66807000  | L H 38 | 0.0000 |
| H | 0 | 4.59090100  | 0.75502600  | 2.58084700  | L      |        |
| H | 0 | 4.79311000  | 1.06253300  | 0.85382400  | L      |        |
| C | 0 | 6.60554300  | 0.44856800  | 1.86743400  | L      |        |
| H | 0 | 6.89472500  | 1.50934100  | 2.02436500  | L      |        |
| H | 0 | 6.89648800  | -0.07285000 | 2.80063300  | L      |        |
| C | 0 | 7.39057500  | -0.13280100 | 0.66368700  | L      |        |
| C | 0 | 7.02421200  | -1.66240800 | 0.54499300  | L H 43 | 0.0000 |
| C | 0 | 7.81853400  | -2.23652400 | -0.65685500 | L      |        |
| H | 0 | 7.52731000  | -1.71569300 | -1.59064900 | L      |        |
| H | 0 | 7.55520400  | -3.30229900 | -0.81304800 | L      |        |
| C | 0 | 9.32970000  | -2.12883500 | -0.44601000 | L      |        |
| H | 0 | 9.85076500  | -2.50575900 | -1.34815700 | L      |        |

|   |   |              |             |             |   |      |        |
|---|---|--------------|-------------|-------------|---|------|--------|
| H | 0 | 9.62874700   | -2.82527800 | 0.36646800  | L |      |        |
| C | 0 | 8.92320600   | 0.00451500  | 0.93277400  | L |      |        |
| H | 0 | 9.09878900   | -0.52530000 | 1.91098900  | L |      |        |
| C | 0 | 9.84412100   | -0.70855300 | -0.10405500 | L |      |        |
| C | 0 | 9.97960000   | 0.11732500  | -1.40606600 | L |      |        |
| H | 0 | 9.00193100   | 0.12102800  | -1.94830700 | L |      |        |
| H | 0 | 10.68924100  | -0.37647600 | -2.09890900 | L |      |        |
| C | 0 | 9.58719200   | 2.29989700  | -0.10737600 | L |      |        |
| H | 0 | 8.57278400   | 2.48373900  | -0.57288800 | L |      |        |
| C | 0 | 9.38484200   | 1.45758700  | 1.16266600  | L |      |        |
| H | 0 | 10.33193700  | 1.43853000  | 1.74146600  | L |      |        |
| H | 0 | 8.65594500   | 1.97969300  | 1.81964300  | L |      |        |
| C | 0 | 11.25533800  | -0.86752500 | 0.50754900  | L |      |        |
| H | 0 | 11.23208400  | -1.43618500 | 1.44389900  | L |      |        |
| H | 0 | 11.71866200  | 0.09885000  | 0.73333100  | L |      |        |
| H | 0 | 11.93077900  | -1.39721500 | -0.17323200 | L |      |        |
| C | 0 | 10.21938000  | 3.64910400  | 0.22680200  | L |      |        |
| H | 0 | 9.58121900   | 4.23403600  | 0.89974200  | L |      |        |
| H | 0 | 10.38186700  | 4.24731300  | -0.67858700 | L |      |        |
| H | 0 | 11.19391700  | 3.53546700  | 0.71706100  | L |      |        |
| C | 0 | 10.39802300  | 1.53818800  | -1.14369500 | L |      |        |
| O | 0 | 11.30992000  | 2.04790700  | -1.77378900 | L |      |        |
| C | 0 | 6.94999400   | 0.60468300  | -0.61203400 | L |      |        |
| H | 0 | 5.87927700   | 0.49141800  | -0.81356100 | L |      |        |
| H | 0 | 7.48081900   | 0.23681500  | -1.50459100 | L |      |        |
| H | 0 | 7.14953700   | 1.68448500  | -0.53787800 | L |      |        |
| C | 0 | 7.39924900   | -2.47755000 | 1.79763500  | L |      |        |
| H | 0 | 6.95805800   | -2.06174800 | 2.71683700  | L |      |        |
| H | 0 | 8.48569000   | -2.50673300 | 1.95400200  | L |      |        |
| H | 0 | 7.06129400   | -3.51661900 | 1.70965400  | L |      |        |
| C | 0 | -5.82283200  | 2.19382700  | 0.01161800  | L | H 11 | 0.0000 |
| H | 0 | -5.64451700  | 3.29020300  | 0.00103500  | L |      |        |
| H | 0 | -5.42012400  | 1.83762800  | 0.98581200  | L |      |        |
| C | 0 | -7.33178600  | 1.94257000  | -0.01419900 | L |      |        |
| H | 0 | -7.79631500  | 2.47510600  | -0.86671600 | L |      |        |
| H | 0 | -7.78260300  | 2.39546800  | 0.89405300  | L |      |        |
| C | 0 | -7.67745600  | 0.43168200  | -0.07456900 | L |      |        |
| C | 0 | -7.10035100  | -0.13266800 | -1.42694400 | L | H 12 | 0.0000 |
| C | 0 | -7.01519500  | -0.27654500 | 1.12093400  | L |      |        |
| H | 0 | -7.42558700  | 0.07962600  | 2.07232600  | L |      |        |
| H | 0 | -5.93279700  | -0.10800000 | 1.15626200  | L |      |        |
| H | 0 | -7.16049700  | -1.36583000 | 1.08552500  | L |      |        |
| C | 0 | -7.69569300  | 0.55808100  | -2.67038800 | L |      |        |
| H | 0 | -8.78061800  | 0.40459800  | -2.73893100 | L |      |        |
| H | 0 | -7.25572800  | 0.16085500  | -3.59233300 | L |      |        |
| H | 0 | -7.52906700  | 1.64661100  | -2.66629200 | L |      |        |
| C | 0 | -7.45597700  | -1.63974800 | -1.49565300 | L |      |        |
| H | 0 | -6.98481600  | -2.18059400 | -0.65034200 | L |      |        |
| H | 0 | -7.03263800  | -2.09182400 | -2.41538000 | L |      |        |
| C | 0 | -8.96834500  | -1.86323500 | -1.48629600 | L |      |        |
| H | 0 | -9.39425300  | -1.48115300 | -2.43825100 | L |      |        |
| H | 0 | -9.17708900  | -2.95133400 | -1.49901200 | L |      |        |
| C | 0 | -9.23283100  | 0.25470000  | -0.05114400 | L |      |        |
| H | 0 | -9.61831100  | 0.85210000  | -0.92110100 | L |      |        |
| C | 0 | -9.71797700  | -1.20707300 | -0.29764800 | L |      |        |
| C | 0 | -11.21513600 | -1.18552900 | -0.68324200 | L |      |        |
| H | 0 | -11.58208000 | -2.18802000 | -0.92945800 | L |      |        |
| H | 0 | -11.40118200 | -0.54927700 | -1.55525100 | L |      |        |
| H | 0 | -11.84791600 | -0.80490100 | 0.13105100  | L |      |        |
| C | 0 | -9.85323800  | 0.88473900  | 1.21846600  | L |      |        |
| H | 0 | -10.56270200 | 1.67953500  | 0.91084400  | L |      |        |
| H | 0 | -9.06833800  | 1.41848900  | 1.79797600  | L |      |        |
| C | 0 | -10.59645000 | -0.07828000 | 2.16067800  | L |      |        |
| H | 0 | -11.59877200 | -0.32189800 | 1.69648400  | L |      |        |
| C | 0 | -9.53167100  | -2.08542300 | 0.96198500  | L |      |        |
| H | 0 | -10.14779100 | -3.00671800 | 0.88236800  | L |      |        |
| H | 0 | -8.48103500  | -2.46024100 | 1.00290800  | L |      |        |
| C | 0 | -9.84579100  | -1.39378000 | 2.25961100  | L |      |        |
| O | 0 | -9.52281200  | -1.89800300 | 3.32312100  | L |      |        |
| C | 0 | -10.83573300 | 0.55721100  | 3.52707400  | L |      |        |
| H | 0 | -11.39620700 | -0.11608000 | 4.18718500  | L |      |        |
| H | 0 | -11.41194300 | 1.48646100  | 3.43998300  | L |      |        |
| H | 0 | -9.89534000  | 0.80161100  | 4.03595400  | L |      |        |

Gibbs Free Energy = -383.694849

## TS2

|   |   |             |             |             |   |      |        |
|---|---|-------------|-------------|-------------|---|------|--------|
| C | 0 | 3.24349500  | 2.78816500  | -1.25361300 | H |      |        |
| C | 0 | 0.96594300  | 3.10569700  | -0.21144600 | H |      |        |
| C | 0 | 2.69686400  | 1.72367900  | 0.89612600  | H |      |        |
| C | 0 | 1.20654500  | 1.82649200  | 0.59795700  | H |      |        |
| C | 0 | 3.64691200  | 2.14156400  | -0.12484200 | H |      |        |
| C | 0 | 1.89811900  | 3.30399800  | -1.41655800 | H |      |        |
| H | 0 | 3.95352400  | 3.07270200  | -2.02603600 | H |      |        |
| O | 0 | 1.55881400  | 4.00376100  | -2.36323300 | H |      |        |
| C | 0 | 3.14231400  | 1.08345000  | 2.00093400  | H |      |        |
| H | 0 | 2.43138200  | 0.76283400  | 2.75439100  | H |      |        |
| C | 0 | 5.17136900  | 1.97182500  | 0.15550800  | H |      |        |
| C | 0 | 5.48707500  | 0.99061900  | 1.30764800  | H |      |        |
| C | 0 | 4.51826100  | 0.68509000  | 2.19307100  | H |      |        |
| H | 0 | 4.72424800  | 0.06619900  | 3.05941300  | H |      |        |
| C | 0 | 5.60056900  | 3.37249400  | 0.60782100  | L | H 11 | 0.0000 |
| H | 0 | 5.32892000  | 4.14746900  | -0.12089300 | L |      |        |
| H | 0 | 6.69599000  | 3.43577100  | 0.73045900  | L |      |        |
| H | 0 | 5.15223800  | 3.65427300  | 1.56927000  | L |      |        |
| O | 0 | 0.62233800  | 4.15860100  | 0.39457400  | H |      |        |
| H | 0 | -0.20373700 | 4.91104300  | -0.58811600 | H |      |        |
| C | 0 | 0.32106100  | 1.81491500  | 1.83725100  | H |      |        |
| H | 0 | -0.70447900 | 2.07911600  | 1.57500100  | H |      |        |
| H | 0 | 0.68396600  | 2.54391400  | 2.56186600  | H |      |        |
| H | 0 | 0.31984400  | 0.81904400  | 2.28569800  | H |      |        |
| O | 0 | 0.96628000  | 0.67274300  | -0.24076900 | H |      |        |
| O | 0 | -0.50105900 | 2.61371600  | -1.23341800 | H |      |        |
| C | 0 | -0.35529100 | 0.40244400  | -0.50602800 | H |      |        |
| C | 0 | -1.12741800 | 1.45174100  | -1.02339100 | H |      |        |
| C | 0 | -2.47078700 | 1.24766100  | -1.30647600 | H |      |        |
| H | 0 | -3.04935500 | 2.07381200  | -1.71220700 | H |      |        |
| C | 0 | -3.05071700 | -0.00574200 | -1.09491800 | H |      |        |
| C | 0 | -2.26037800 | -1.05766700 | -0.59802800 | H |      |        |
| C | 0 | -0.89405300 | -0.85368500 | -0.26865800 | H |      |        |
| C | 0 | -0.00636600 | -1.91053000 | 0.33962000  | H |      |        |
| H | 0 | 0.19940900  | -2.70976800 | -0.37513500 | H |      |        |
| H | 0 | -0.49377000 | -2.38004500 | 1.19514400  | H |      |        |
| H | 0 | 0.93474700  | -1.46034400 | 0.65476900  | H |      |        |
| C | 0 | -4.53097300 | -0.20445800 | -1.51658200 | H |      |        |
| C | 0 | -2.89261000 | -2.38178100 | -0.39437500 | H |      |        |
| O | 0 | -2.25223500 | -3.40155000 | -0.14877800 | H |      |        |
| C | 0 | -4.35713700 | -2.46027100 | -0.44944000 | H |      |        |
| H | 0 | -4.74931400 | -3.40623900 | -0.08940500 | H |      |        |
| C | 0 | -5.15338300 | -1.48263700 | -0.91087400 | H |      |        |
| C | 0 | -4.49433700 | -0.36089200 | -3.03924200 | L | H 38 | 0.0000 |
| H | 0 | -3.94783600 | 0.45939000  | -3.52307800 | L |      |        |
| H | 0 | -5.50883000 | -0.35698200 | -3.47217700 | L |      |        |
| H | 0 | -4.01330600 | -1.29768800 | -3.34711800 | L |      |        |
| H | 0 | -0.27695900 | 5.13608600  | -2.15621400 | H |      |        |
| O | 0 | -0.86368100 | 4.94336000  | -1.40136400 | H |      |        |
| H | 0 | -0.94850500 | 3.82918800  | -1.43610500 | H |      |        |
| C | 0 | -5.33116900 | 1.04583700  | -1.11579900 | L | H 38 | 0.0000 |
| H | 0 | -5.06455700 | 1.89152800  | -1.78482800 | L |      |        |
| H | 0 | -5.02390500 | 1.37078000  | -0.09821400 | L |      |        |
| C | 0 | -6.84897600 | 0.85810700  | -1.14383100 | L |      |        |
| H | 0 | -7.33651800 | 1.78596100  | -0.77689600 | L |      |        |
| H | 0 | -7.19948600 | 0.73851400  | -2.18792800 | L |      |        |
| C | 0 | -6.67226600 | -1.64999000 | -0.90437800 | L | H 43 | 0.0000 |
| C | 0 | -7.30976200 | -0.34719500 | -0.28470100 | L |      |        |
| C | 0 | -8.86650100 | -0.46033800 | -0.34917500 | L |      |        |
| H | 0 | -9.11029000 | -0.53970500 | -1.44579400 | L |      |        |
| C | 0 | -9.46536900 | -1.74052000 | 0.30957700  | L |      |        |
| C | 0 | -8.66576200 | -3.01030200 | -0.07359100 | L |      |        |
| H | 0 | -8.95688200 | -3.84742900 | 0.59114900  | L |      |        |
| H | 0 | -8.97219900 | -3.33521400 | -1.09102000 | L |      |        |
| C | 0 | -7.14477800 | -2.85064300 | -0.04407200 | L |      |        |
| H | 0 | -6.68036300 | -3.78796500 | -0.41173200 | L |      |        |
| H | 0 | -6.79551800 | -2.73253300 | 1.00084800  | L |      |        |
| C | 0 | -6.79423800 | -0.15285600 | 1.15137100  | L |      |        |
| H | 0 | -7.18415300 | 0.77682600  | 1.59276400  | L |      |        |
| H | 0 | -5.70140400 | -0.09492300 | 1.19977600  | L |      |        |
| H | 0 | -7.09740100 | -0.97981100 | 1.81305000  | L |      |        |
| C | 0 | -7.10655400 | -1.90692900 | -2.36040300 | L |      |        |

|   |   |              |             |             |   |      |        |
|---|---|--------------|-------------|-------------|---|------|--------|
| H | 0 | -6.90505500  | -1.04569600 | -3.01625100 | L |      |        |
| H | 0 | -8.18206600  | -2.11524400 | -2.43370900 | L |      |        |
| H | 0 | -6.58367400  | -2.77326200 | -2.78181800 | L |      |        |
| C | 0 | -9.52083000  | -1.61311400 | 1.85116100  | L |      |        |
| H | 0 | -8.48168300  | -1.62100900 | 2.26317200  | L |      |        |
| H | 0 | -10.00965800 | -2.50505300 | 2.29090600  | L |      |        |
| C | 0 | -9.72885700  | 0.94142500  | 1.67181000  | L |      |        |
| H | 0 | -8.69699900  | 1.12921900  | 2.09552100  | L |      |        |
| C | 0 | -9.60100300  | 0.80183100  | 0.14598300  | L |      |        |
| H | 0 | -9.09165400  | 1.70733400  | -0.24919600 | L |      |        |
| H | 0 | -10.61413400 | 0.82059600  | -0.30720800 | L |      |        |
| C | 0 | -10.91053800 | -1.93694400 | -0.20437700 | L |      |        |
| H | 0 | -10.94609600 | -2.02512900 | -1.29598000 | L |      |        |
| H | 0 | -11.56322000 | -1.10118400 | 0.06912300  | L |      |        |
| H | 0 | -11.36261400 | -2.84634400 | 0.20665600  | L |      |        |
| C | 0 | -10.62519600 | 2.12170400  | 2.03923400  | L |      |        |
| H | 0 | -10.22123700 | 3.06555900  | 1.65388800  | L |      |        |
| H | 0 | -10.72266800 | 2.22531500  | 3.12714500  | L |      |        |
| H | 0 | -11.63798100 | 2.01029300  | 1.63343500  | L |      |        |
| C | 0 | -10.21555400 | -0.35586300 | 2.29723400  | L |      |        |
| O | 0 | -11.08730500 | -0.39286700 | 3.15000700  | L |      |        |
| C | 0 | 7.30095800   | 1.04749800  | -0.95732200 | L |      |        |
| C | 0 | 5.87777600   | 1.57554700  | -1.14854000 | L | H 11 | 0.0000 |
| H | 0 | 5.90932000   | 2.44397900  | -1.84022100 | L |      |        |
| H | 0 | 5.27438800   | 0.80354000  | -1.67441600 | L |      |        |
| H | 0 | 7.97561500   | 1.86820800  | -0.64478600 | L |      |        |
| H | 0 | 7.68889100   | 0.70821200  | -1.94090900 | L |      |        |
| C | 0 | 6.98513600   | -0.71941200 | 2.48354800  | L |      |        |
| H | 0 | 6.30792000   | -1.54300200 | 2.17993600  | L |      |        |
| H | 0 | 6.62304600   | -0.38260900 | 3.47586700  | L |      |        |
| C | 0 | 8.41466600   | -1.24129100 | 2.62943300  | L |      |        |
| H | 0 | 8.42297100   | -2.09123900 | 3.34015900  | L |      |        |
| H | 0 | 9.03568800   | -0.45866700 | 3.11484300  | L |      |        |
| C | 0 | 8.84738600   | -0.62614300 | 0.16921000  | L |      |        |
| H | 0 | 9.45736000   | 0.27376300  | 0.45222500  | L |      |        |
| C | 0 | 6.90221500   | 0.44275300  | 1.46089300  | L | H 12 | 0.0000 |
| C | 0 | 7.37012900   | -0.11795800 | 0.06440700  | L |      |        |
| C | 0 | 7.78738500   | 1.59477500  | 1.97556700  | L |      |        |
| H | 0 | 7.40969100   | 1.98860100  | 2.92633600  | L |      |        |
| H | 0 | 7.83794100   | 2.43508000  | 1.26569900  | L |      |        |
| H | 0 | 8.82024400   | 1.26652000  | 2.15090100  | L |      |        |
| C | 0 | 6.42398400   | -1.23987600 | -0.40000200 | L |      |        |
| H | 0 | 5.39720500   | -0.88447300 | -0.54298600 | L |      |        |
| H | 0 | 6.37196500   | -2.06205400 | 0.32815600  | L |      |        |
| H | 0 | 6.75044900   | -1.66671000 | -1.35484500 | L |      |        |
| C | 0 | 8.56776700   | -3.07107300 | 0.90171700  | L |      |        |
| H | 0 | 7.47159400   | -3.13123900 | 1.10359400  | L |      |        |
| H | 0 | 9.01035200   | -3.84909300 | 1.56010300  | L |      |        |
| C | 0 | 9.38010400   | -1.09812100 | -1.20477900 | L |      |        |
| H | 0 | 10.25791200  | -0.47806700 | -1.47802200 | L |      |        |
| H | 0 | 8.62818900   | -0.88412900 | -1.99567700 | L |      |        |
| C | 0 | 9.79369000   | -2.57701600 | -1.30141500 | L |      |        |
| H | 0 | 10.79228700  | -2.69805900 | -0.78401100 | L |      |        |
| C | 0 | 9.09053900   | -1.67122200 | 1.30139000  | L |      |        |
| C | 0 | 10.60667200  | -1.76039400 | 1.59132900  | L |      |        |
| H | 0 | 11.02920000  | -0.78372300 | 1.85077600  | L |      |        |
| H | 0 | 11.17337300  | -2.13415000 | 0.72672900  | L |      |        |
| H | 0 | 10.81773300  | -2.43687200 | 2.42688300  | L |      |        |
| C | 0 | 8.81230700   | -3.44399900 | -0.53410800 | L |      |        |
| O | 0 | 8.25492800   | -4.41296900 | -1.02418200 | L |      |        |
| C | 0 | 9.94340800   | -3.01794800 | -2.75447600 | L |      |        |
| H | 0 | 8.99916500   | -2.93718800 | -3.30674600 | L |      |        |
| H | 0 | 10.26842700  | -4.06351900 | -2.82290300 | L |      |        |
| H | 0 | 10.68658900  | -2.40767900 | -3.28193100 | L |      |        |

Gibbs Free Energy= -1300.452629 Hartrees

### III. Two-water Case

#### 2-wt-a pathway

# TS1

|   |   |             |             |             |        |        |  |
|---|---|-------------|-------------|-------------|--------|--------|--|
| C | 0 | -2.95252300 | 2.80914600  | 0.07866700  | H      |        |  |
| C | 0 | -0.58430000 | 2.25206500  | -0.60947300 | H      |        |  |
| C | 0 | -2.54740500 | 1.06980600  | -1.59319900 | H      |        |  |
| C | 0 | -1.11472700 | 1.23834400  | -1.45997100 | H      |        |  |
| C | 0 | -3.44909200 | 1.88294300  | -0.77844000 | H      |        |  |
| C | 0 | -1.53519000 | 3.09085400  | 0.19672800  | H      |        |  |
| H | 0 | -3.60572700 | 3.44007500  | 0.67589800  | H      |        |  |
| O | 0 | -1.10244800 | 4.02595500  | 0.86973200  | H      |        |  |
| C | 0 | -3.08798000 | 0.08802000  | -2.37450400 | H      |        |  |
| H | 0 | -2.43792400 | -0.53574100 | -2.97702200 | H      |        |  |
| C | 0 | -4.97935100 | 1.78923900  | -1.02922700 | H      |        |  |
| C | 0 | -5.40999100 | 0.47393800  | -1.71375800 | H      |        |  |
| C | 0 | -4.48656800 | -0.24535600 | -2.38781300 | H      |        |  |
| H | 0 | -4.76570900 | -1.12991700 | -2.95014200 | H      |        |  |
| C | 0 | -5.25541700 | 2.93627100  | -2.01091600 | L H 11 | 0.0000 |  |
| H | 0 | -4.88818200 | 3.89942000  | -1.63373500 | L      |        |  |
| H | 0 | -6.33757300 | 3.06138400  | -2.18675800 | L      |        |  |
| H | 0 | -4.78594600 | 2.76639100  | -2.98800200 | L      |        |  |
| O | 0 | 0.66201700  | 2.42257300  | -0.50935100 | H      |        |  |
| C | 0 | 1.18235600  | 3.25266600  | 0.63126700  | H      |        |  |
| C | 0 | -0.10870100 | 0.55824800  | -2.31897100 | H      |        |  |
| H | 0 | 0.37908000  | 1.29368100  | -2.96701700 | H      |        |  |
| H | 0 | -0.50840200 | -0.24723100 | -2.93048700 | H      |        |  |
| O | 0 | 0.69061500  | 0.15900700  | -1.67822800 | H      |        |  |
| O | 0 | -1.00774700 | 0.07818700  | 0.43638900  | H      |        |  |
| O | 0 | 0.27457800  | 1.58700000  | 2.27898700  | H      |        |  |
| C | 0 | 0.18263800  | -0.21354700 | 0.73566500  | H      |        |  |
| C | 0 | 0.90143200  | 0.66252900  | 1.67555600  | H      |        |  |
| C | 0 | 2.29538500  | 0.42600200  | 1.85669800  | H      |        |  |
| H | 0 | 2.83062900  | 1.09974100  | 2.52203500  | H      |        |  |
| C | 0 | 2.92971700  | -0.64664000 | 1.28325000  | H      |        |  |
| C | 0 | 2.19497000  | -1.57832500 | 0.45976500  | H      |        |  |
| C | 0 | 0.85918800  | -1.36542600 | 0.16177500  | H      |        |  |
| C | 0 | 0.01637200  | -2.27285200 | -0.69306400 | H      |        |  |
| H | 0 | -0.14072500 | -3.22947600 | -0.18961500 | H      |        |  |
| H | 0 | 0.51342100  | -2.50055900 | -1.63697200 | H      |        |  |
| H | 0 | -0.94668600 | -1.79717400 | -0.87947000 | H      |        |  |
| C | 0 | 4.42264700  | -0.90114300 | 1.63925700  | H      |        |  |
| C | 0 | 2.92026600  | -2.73826000 | -0.11302800 | H      |        |  |
| O | 0 | 2.34832400  | -3.69247400 | -0.63377100 | H      |        |  |
| C | 0 | 4.38596200  | -2.70333900 | -0.10147000 | H      |        |  |
| H | 0 | 4.84076600  | -3.45351600 | -0.74067500 | H      |        |  |
| C | 0 | 5.11841700  | -1.85807100 | 0.64176400  | H      |        |  |
| C | 0 | 4.38349700  | -1.58634100 | 3.00652200  | L H 38 | 0.0000 |  |
| H | 0 | 3.81501600  | -1.00557400 | 3.74521700  | L      |        |  |
| H | 0 | 5.39800800  | -1.71072900 | 3.42416100  | L      |        |  |
| H | 0 | 3.93042700  | -2.58512600 | 2.96004100  | L      |        |  |
| O | 0 | 1.18138500  | 4.41166600  | 1.83276200  | H      |        |  |
| H | 0 | 1.55085900  | 3.50772200  | 1.56884200  | H      |        |  |
| H | 0 | 1.02677600  | 2.74142800  | 2.10614400  | H      |        |  |
| C | 0 | 5.14365100  | 0.45310900  | 1.72321900  | L H 38 | 0.0000 |  |
| H | 0 | 4.83632000  | 0.98543500  | 2.64906600  | L      |        |  |
| H | 0 | 4.80993400  | 1.10440400  | 0.88587600  | L      |        |  |
| C | 0 | 6.66973200  | 0.35921900  | 1.69774800  | L      |        |  |
| H | 0 | 7.09639600  | 1.38486600  | 1.69070900  | L      |        |  |
| H | 0 | 7.04069100  | -0.10241300 | 2.63396900  | L      |        |  |
| C | 0 | 6.64435200  | -1.90471800 | 0.58416900  | L H 43 | 0.0000 |  |
| C | 0 | 7.18906000  | -0.42989500 | 0.46899200  | L      |        |  |
| C | 0 | 8.75071800  | -0.45742500 | 0.49886000  | L      |        |  |
| H | 0 | 9.01775300  | -0.90183800 | 1.49888700  | L      |        |  |
| C | 0 | 9.41757900  | -1.38265200 | -0.56451500 | L      |        |  |
| C | 0 | 8.70489000  | -2.75438200 | -0.65857300 | L      |        |  |
| H | 0 | 9.03687100  | -3.28345100 | -1.57381000 | L      |        |  |
| H | 0 | 9.04744400  | -3.39708600 | 0.18031300  | L      |        |  |
| C | 0 | 7.17689500  | -2.69165400 | -0.64125400 | L      |        |  |
| H | 0 | 6.77764900  | -3.72639000 | -0.63324100 | L      |        |  |
| H | 0 | 6.80380500  | -2.23466900 | -1.57929800 | L      |        |  |
| C | 0 | 6.63767500  | 0.22528300  | -0.80841300 | L      |        |  |
| H | 0 | 6.95653500  | 1.27568200  | -0.88784100 | L      |        |  |
| H | 0 | 5.54299300  | 0.21998700  | -0.84486900 | L      |        |  |
| H | 0 | 6.98624000  | -0.28924800 | -1.71832200 | L      |        |  |
| C | 0 | 7.11469400  | -2.62846900 | 1.86112700  | L      |        |  |
| C | 0 | 6.83512200  | -2.08743000 | 2.77857500  | L      |        |  |
| H | 0 | 8.20636100  | -2.74455500 | 1.88345200  | L      |        |  |
| H | 0 | 6.68462400  | -3.63466800 | 1.92750100  | L      |        |  |

|   |   |              |             |             |   |      |        |
|---|---|--------------|-------------|-------------|---|------|--------|
| C | 0 | 9.43960500   | -0.71744500 | -1.96195000 | L |      |        |
| H | 0 | 8.39636400   | -0.64471000 | -2.35666800 | L |      |        |
| H | 0 | 9.97458300   | -1.36471300 | -2.68467800 | L |      |        |
| C | 0 | 9.48890100   | 1.61796200  | -0.89416500 | L |      |        |
| H | 0 | 8.44061300   | 1.87346100  | -1.23308100 | L |      |        |
| C | 0 | 9.39526300   | 0.94335400  | 0.48434100  | L |      |        |
| H | 0 | 8.83635200   | 1.61698300  | 1.16947800  | L |      |        |
| H | 0 | 10.41250900  | 0.86752700  | 0.92223700  | L |      |        |
| C | 0 | 10.88022400  | -1.65416400 | -0.14304700 | L |      |        |
| H | 0 | 10.93939300  | -2.11927200 | 0.84735900  | L |      |        |
| H | 0 | 11.47481400  | -0.73550100 | -0.09909100 | L |      |        |
| H | 0 | 11.38177900  | -2.32903800 | -0.84545200 | L |      |        |
| C | 0 | 10.30078500  | 2.90887800  | -0.81810400 | L |      |        |
| H | 0 | 9.83927300   | 3.63189500  | -0.13500200 | L |      |        |
| H | 0 | 10.37976900  | 3.38766100  | -1.80230800 | L |      |        |
| H | 0 | 11.32307700  | 2.73119700  | -0.46295200 | L |      |        |
| C | 0 | 10.04978900  | 0.65722400  | -1.93038000 | L |      |        |
| O | 0 | 10.91408900  | 0.97611000  | -2.72991000 | L |      |        |
| C | 0 | -7.19689500  | 1.60967500  | 0.27041500  | L |      |        |
| C | 0 | -5.72215800  | 2.01674900  | 0.29573500  | L | H 11 | 0.0000 |
| H | 0 | -5.65136000  | 3.08529100  | 0.58897600  | L |      |        |
| H | 0 | -5.20821200  | 1.45529700  | 1.10628100  | L |      |        |
| H | 0 | -7.77552100  | 2.30323300  | -0.36998000 | L |      |        |
| H | 0 | -7.61726100  | 1.73311200  | 1.29051300  | L |      |        |
| C | 0 | -7.08783300  | -1.40460800 | -2.16989400 | L |      |        |
| H | 0 | -6.50324000  | -2.10132600 | -1.53611900 | L |      |        |
| H | 0 | -6.69318400  | -1.53091200 | -3.19819200 | L |      |        |
| C | 0 | -8.56601400  | -1.79453900 | -2.15578800 | L |      |        |
| H | 0 | -8.66809800  | -2.85282800 | -2.46738800 | L |      |        |
| H | 0 | -9.09786100  | -1.21492700 | -2.93988800 | L |      |        |
| C | 0 | -8.92434200  | -0.20473300 | -0.16451000 | L |      |        |
| H | 0 | -9.43076100  | 0.56453700  | -0.80777800 | L |      |        |
| C | 0 | -6.87607200  | 0.05455600  | -1.69094100 | L | H 12 | 0.0000 |
| C | 0 | -7.39937300  | 0.14780200  | -0.20781400 | L |      |        |
| C | 0 | -7.63305100  | 0.98897700  | -2.65590200 | L |      |        |
| H | 0 | -7.22522100  | 0.92231200  | -3.67091300 | L |      |        |
| H | 0 | -7.57789000  | 2.04421000  | -2.34607500 | L |      |        |
| H | 0 | -8.69841900  | 0.73244400  | -2.71831800 | L |      |        |
| C | 0 | -6.58292800  | -0.78755200 | 0.70253000  | L |      |        |
| H | 0 | -5.52231500  | -0.51289900 | 0.73314600  | L |      |        |
| H | 0 | -6.62558200  | -1.83229800 | 0.36268000  | L |      |        |
| H | 0 | -6.95100600  | -0.76104800 | 1.73394900  | L |      |        |
| C | 0 | -8.92257800  | -2.75262100 | 0.14957000  | L |      |        |
| H | 0 | -7.83973600  | -2.99959700 | 0.03805500  | L |      |        |
| H | 0 | -9.44903900  | -3.67902800 | -0.16504200 | L |      |        |
| C | 0 | -9.50323500  | -0.03020700 | 1.25979100  | L |      |        |
| H | 0 | -10.30146900 | 0.73878200  | 1.22759400  | L |      |        |
| H | 0 | -8.72852600  | 0.39761800  | 1.93317400  | L |      |        |
| C | 0 | -10.08593300 | -1.29447900 | 1.91525800  | L |      |        |
| H | 0 | -11.09035300 | -1.50692500 | 1.44024000  | L |      |        |
| C | 0 | -9.28455300  | -1.58409600 | -0.79741300 | L |      |        |
| C | 0 | -10.80135200 | -1.62465300 | -1.09548700 | L |      |        |
| H | 0 | -11.11072700 | -0.79633300 | -1.74193400 | L |      |        |
| H | 0 | -11.40641000 | -1.55887800 | -0.18005800 | L |      |        |
| H | 0 | -11.08780400 | -2.55386000 | -1.60022500 | L |      |        |
| C | 0 | -9.20830000  | -2.49282400 | 1.60284700  | L |      |        |
| O | 0 | -8.76320800  | -3.23598500 | 2.46277300  | L |      |        |
| C | 0 | -10.29062600 | -1.09759800 | 3.41437700  | L |      |        |
| H | 0 | -9.34265500  | -0.92494700 | 3.93819100  | L |      |        |
| H | 0 | -10.75876100 | -1.97772900 | 3.87191000  | L |      |        |
| H | 0 | -10.93985200 | -0.23740500 | 3.61884900  | L |      |        |
| H | 0 | -0.40568700  | 5.51221600  | 1.86737700  | H |      |        |
| O | 0 | 0.46958700   | 5.77136000  | 2.19823400  | H |      |        |
| H | 0 | 0.36815400   | 5.89956600  | 3.14932700  | H |      |        |

Gibbs Free Energy= -1376.813534 Hartrees

### Intermediate

|   |   |             |            |             |   |  |  |
|---|---|-------------|------------|-------------|---|--|--|
| C | 0 | -3.19878200 | 3.01666400 | 0.28423600  | H |  |  |
| C | 0 | -0.86044800 | 2.90527300 | -0.68068000 | H |  |  |
| C | 0 | -2.63608100 | 1.30200600 | -1.39511100 | H |  |  |
| C | 0 | -1.15191700 | 1.46129800 | -1.10792200 | H |  |  |
| C | 0 | -3.59245900 | 2.04330300 | -0.59011400 | H |  |  |

|   |   |             |             |             |        |        |  |
|---|---|-------------|-------------|-------------|--------|--------|--|
| C | 0 | -1.85467800 | 3.53570500  | 0.30055600  | H      |        |  |
| H | 0 | -3.92146600 | 3.54265000  | 0.90231700  | H      |        |  |
| O | 0 | -1.49063700 | 4.50637600  | 0.95566700  | H      |        |  |
| C | 0 | -3.07968300 | 0.35419000  | -2.25438600 | H      |        |  |
| H | 0 | -2.36427100 | -0.20211600 | -2.85042500 | H      |        |  |
| C | 0 | -5.11465300 | 1.82133700  | -0.84001800 | H      |        |  |
| C | 0 | -5.43761700 | 0.53708000  | -1.63610500 | H      |        |  |
| C | 0 | -4.46096000 | -0.05296000 | -2.35379200 | H      |        |  |
| H | 0 | -4.66753700 | -0.90699500 | -2.98896700 | H      |        |  |
| C | 0 | -5.49696800 | 3.01878100  | -1.71806800 | L H 11 | 0.0000 |  |
| H | 0 | -5.21600500 | 3.97782200  | -1.26294500 | L      |        |  |
| H | 0 | -6.58808300 | 3.06463300  | -1.88096000 | L      |        |  |
| H | 0 | -5.02508600 | 2.97641800  | -2.70836400 | L      |        |  |
| O | 0 | 0.08585800  | 3.54663200  | -1.07219700 | H      |        |  |
| H | 0 | 0.66415200  | 4.87796400  | 0.68513100  | H      |        |  |
| C | 0 | -0.23234100 | 1.06988300  | -2.25208500 | H      |        |  |
| H | 0 | -0.50313800 | 1.63994500  | -3.14286100 | H      |        |  |
| H | 0 | -0.30389900 | 0.00531500  | -2.47340400 | H      |        |  |
| H | 0 | 0.80064700  | 1.30559700  | -1.99509600 | H      |        |  |
| O | 0 | -0.96852800 | 0.64286000  | 0.08514200  | H      |        |  |
| O | 0 | 0.42692300  | 2.34277200  | 1.60593200  | H      |        |  |
| C | 0 | 0.32683400  | 0.30900500  | 0.42595100  | H      |        |  |
| C | 0 | 1.06452900  | 1.22713700  | 1.18808000  | H      |        |  |
| C | 0 | 2.38600000  | 0.95053600  | 1.50813800  | H      |        |  |
| H | 0 | 2.93968600  | 1.67912800  | 2.09590600  | H      |        |  |
| C | 0 | 2.98176800  | -0.24441600 | 1.10311700  | H      |        |  |
| C | 0 | 2.20874900  | -1.19674600 | 0.41560000  | H      |        |  |
| C | 0 | 0.85953200  | -0.92877900 | 0.07148500  | H      |        |  |
| C | 0 | -0.02555900 | -1.91767200 | -0.64726800 | H      |        |  |
| H | 0 | -0.12701300 | -2.83174700 | -0.06113600 | H      |        |  |
| H | 0 | 0.40805300  | -2.21488700 | -1.60482900 | H      |        |  |
| H | 0 | -1.01215300 | -1.48358600 | -0.80929100 | H      |        |  |
| C | 0 | 4.44512400  | -0.51576900 | 1.54277700  | H      |        |  |
| C | 0 | 2.85200100  | -2.47651800 | 0.02242700  | H      |        |  |
| O | 0 | 2.22592700  | -3.43636200 | -0.41854800 | H      |        |  |
| C | 0 | 4.31277800  | -2.56855400 | 0.12025700  | H      |        |  |
| H | 0 | 4.71998200  | -3.44553300 | -0.37281300 | H      |        |  |
| C | 0 | 5.09071300  | -1.68061800 | 0.76015900  | H      |        |  |
| C | 0 | 4.35057200  | -0.92034500 | 3.01609300  | L H 38 | 0.0000 |  |
| H | 0 | 3.78909200  | -0.18749100 | 3.61032800  | L      |        |  |
| H | 0 | 5.34853600  | -0.99707600 | 3.48028600  | L      |        |  |
| H | 0 | 3.85679300  | -1.89147100 | 3.14811300  | L      |        |  |
| H | 0 | 0.88914500  | 4.93988600  | 2.19467500  | H      |        |  |
| O | 0 | 1.35284500  | 4.73870400  | 1.35767600  | H      |        |  |
| H | 0 | 0.99171100  | 3.16676500  | 1.51649600  | H      |        |  |
| C | 0 | 5.25493300  | 0.78111000  | 1.38322600  | L H 38 | 0.0000 |  |
| H | 0 | 4.96369400  | 1.50525600  | 2.17363800  | L      |        |  |
| H | 0 | 4.98388000  | 1.27152300  | 0.42323000  | L      |        |  |
| C | 0 | 6.77103000  | 0.58498300  | 1.43380000  | L      |        |  |
| H | 0 | 7.26991600  | 1.55864800  | 1.24256900  | L      |        |  |
| H | 0 | 7.08432900  | 0.29374700  | 2.45582400  | L      |        |  |
| C | 0 | 6.60913500  | -1.84933200 | 0.77915000  | L H 43 | 0.0000 |  |
| C | 0 | 7.26441700  | -0.46424600 | 0.40481700  | L      |        |  |
| C | 0 | 8.81813400  | -0.59122600 | 0.50454800  | L      |        |  |
| H | 0 | 9.02346500  | -0.85091900 | 1.58106300  | L      |        |  |
| C | 0 | 9.44356600  | -1.74726200 | -0.33445700 | L      |        |  |
| C | 0 | 8.63381700  | -3.06014300 | -0.19508400 | L      |        |  |
| H | 0 | 8.94987300  | -3.77655700 | -0.97891300 | L      |        |  |
| H | 0 | 8.90552800  | -3.55056200 | 0.76423200  | L      |        |  |
| C | 0 | 7.11434000  | -2.89310500 | -0.25043800 | L      |        |  |
| H | 0 | 6.64001000  | -3.87690300 | -0.05896200 | L      |        |  |
| H | 0 | 6.80104800  | -2.60312000 | -1.27305500 | L      |        |  |
| C | 0 | 6.79893100  | -0.03542600 | -0.99695500 | L      |        |  |
| H | 0 | 7.20069900  | 0.95332300  | -1.26568400 | L      |        |  |
| H | 0 | 5.70833000  | 0.03172900  | -1.07451100 | L      |        |  |
| H | 0 | 7.12879200  | -0.74282500 | -1.77444700 | L      |        |  |
| C | 0 | 6.99241100  | -2.34362800 | 2.18732400  | L      |        |  |
| H | 0 | 6.76398100  | -1.60245700 | 2.96893100  | L      |        |  |
| H | 0 | 8.06569900  | -2.56247200 | 2.26361500  | L      |        |  |
| H | 0 | 6.45926900  | -3.26724500 | 2.44110400  | L      |        |  |
| C | 0 | 9.55485100  | -1.36772500 | -1.83096100 | L      |        |  |
| H | 0 | 8.53160100  | -1.30523400 | -2.27642200 | L      |        |  |
| H | 0 | 10.06286600 | -2.17629600 | -2.39314500 | L      |        |  |
| C | 0 | 9.74577400  | 1.12184400  | -1.22623400 | L      |        |  |
| H | 0 | 8.72856900  | 1.37782200  | -1.64979900 | L      |        |  |
| C | 0 | 9.56566800  | 0.73329500  | 0.25030500  | L      |        |  |
| H | 0 | 9.04049500  | 1.56271900  | 0.77162600  | L      |        |  |
| H | 0 | 10.56239500 | 0.67405800  | 0.73532700  | L      |        |  |

|   |   |              |             |             |               |
|---|---|--------------|-------------|-------------|---------------|
| C | 0 | 10.86963800  | -2.03070100 | 0.19191400  | L             |
| H | 0 | 10.86598900  | -2.29859900 | 1.25440800  | L             |
| H | 0 | 11.52947200  | -1.16330200 | 0.08458000  | L             |
| H | 0 | 11.33898100  | -2.86092000 | -0.34736300 | L             |
| C | 0 | 10.64932600  | 2.34485700  | -1.36423300 | L             |
| H | 0 | 10.21890600  | 3.21899200  | -0.86131500 | L             |
| H | 0 | 10.80064700  | 2.61105000  | -2.41801500 | L             |
| H | 0 | 11.64156800  | 2.17399700  | -0.92942600 | L             |
| C | 0 | 10.26052000  | -0.05562300 | -2.03841100 | L             |
| O | 0 | 11.16341500  | 0.04713600  | -2.85238900 | L             |
| C | 0 | -7.28740000  | 1.33539900  | 0.45223000  | L             |
| C | 0 | -5.85356700  | 1.86678100  | 0.50470200  | L H 11 0.0000 |
| H | 0 | -5.87285700  | 2.90812300  | 0.89068000  | L             |
| H | 0 | -5.28063800  | 1.28508100  | 1.25979300  | L             |
| H | 0 | -7.93421300  | 2.03249100  | -0.11533500 | L             |
| H | 0 | -7.70078300  | 1.32647400  | 1.48299000  | L             |
| C | 0 | -6.96319700  | -1.41989800 | -2.26204200 | L             |
| H | 0 | -6.31435700  | -2.12268800 | -1.70133000 | L             |
| H | 0 | -6.57557400  | -1.41566500 | -3.30077800 | L             |
| C | 0 | -8.40410300  | -1.93065600 | -2.27378900 | L             |
| H | 0 | -8.42452600  | -2.95865600 | -2.68662800 | L             |
| H | 0 | -8.99533200  | -1.32413700 | -2.99242300 | L             |
| C | 0 | -8.86094800  | -0.57215100 | -0.13806600 | L             |
| H | 0 | -9.44016100  | 0.20733900  | -0.70292700 | L             |
| C | 0 | -6.86501200  | 0.00036100  | -1.64835800 | L H 12 0.0000 |
| C | 0 | -7.37216100  | -0.08813100 | -0.15869700 | L             |
| C | 0 | -7.70765100  | 0.95409600  | -2.51749500 | L             |
| H | 0 | -7.30031800  | 1.02788700  | -3.53256300 | L             |
| H | 0 | -7.75081100  | 1.97333600  | -2.10283900 | L             |
| H | 0 | -8.74524700  | 0.60766300  | -2.61191800 | L             |
| C | 0 | -6.46547700  | -1.02953800 | 0.65424200  | L             |
| H | 0 | -5.43239600  | -0.66765100 | 0.70834600  | L             |
| H | 0 | -6.42066500  | -2.03714700 | 0.21667200  | L             |
| H | 0 | -6.82148200  | -1.13383600 | 1.68517600  | L             |
| C | 0 | -8.63356100  | -3.12914200 | -0.06719500 | L             |
| H | 0 | -7.53826700  | -3.27708900 | -0.22170100 | L             |
| H | 0 | -9.09359600  | -4.06298900 | -0.45578900 | L             |
| C | 0 | -9.43267600  | -0.58092900 | 1.29974100  | L             |
| H | 0 | -10.30334200 | 0.10462600  | 1.34060000  | L             |
| H | 0 | -8.69392100  | -0.13817200 | 2.00318100  | L             |
| C | 0 | -9.87857600  | -1.94930800 | 1.84427300  | L             |
| H | 0 | -10.86996800 | -2.21254800 | 1.36738800  | L             |
| C | 0 | -9.11283300  | -1.91293500 | -0.89447400 | L             |
| C | 0 | -10.62581800 | -2.05756500 | -1.17804900 | L             |
| H | 0 | -11.01843300 | -1.20140600 | -1.73720000 | L             |
| H | 0 | -11.21588100 | -2.13343200 | -0.25369600 | L             |
| H | 0 | -10.84107700 | -2.95552800 | -1.76769800 | L             |
| O | 0 | -8.90133400  | -3.02586500 | 1.40887900  | L             |
| C | 0 | -8.36556100  | -3.79548300 | 2.19002500  | L             |
| C | 0 | -10.06361100 | -1.91152300 | 3.35827300  | L             |
| H | 0 | -9.13042300  | -1.66587200 | 3.87945200  | L             |
| H | 0 | -10.40255200 | -2.88153200 | 3.74299800  | L             |
| H | 0 | -10.80998400 | -1.16272600 | 3.65024100  | L             |
| H | 0 | -1.12446400  | 4.58829100  | 2.92703900  | H             |
| O | 0 | -0.37913800  | 4.39175300  | 3.51418000  | H             |
| H | 0 | -0.23682700  | 3.44504100  | 3.36819000  | H             |

Gibbs Free Energy= -1376.862759 Hartrees

## TS2

|   |   |            |            |             |   |
|---|---|------------|------------|-------------|---|
| C | 0 | 3.18845500 | 2.58077700 | -1.19534500 | H |
| C | 0 | 1.04296700 | 3.08761600 | 0.02155900  | H |
| C | 0 | 2.76840100 | 1.65322500 | 1.03970500  | H |
| C | 0 | 1.26937000 | 1.79736000 | 0.81692400  | H |
| C | 0 | 3.66002200 | 1.99526400 | -0.05981400 | H |
| C | 0 | 1.84027800 | 3.10793300 | -1.29186600 | H |
| H | 0 | 3.84335900 | 2.79700400 | -2.03570200 | H |
| O | 0 | 1.44660700 | 3.69841300 | -2.29678500 | H |
| C | 0 | 3.27080300 | 1.06506500 | 2.14829700  | H |



|   |   |              |             |             |        |        |  |
|---|---|--------------|-------------|-------------|--------|--------|--|
| H | 0 | 2.60440800   | 0.80298100  | 2.96261500  | H      |        |  |
| C | 0 | 5.19509900   | 1.81404800  | 0.13396600  | H      |        |  |
| C | 0 | 5.56762700   | 0.89283700  | 1.31849600  | H      |        |  |
| C | 0 | 4.65085000   | 0.65178800  | 2.27584400  | H      |        |  |
| H | 0 | 4.90142000   | 0.07671900  | 3.16054400  | H      |        |  |
| C | 0 | 5.67017100   | 3.23086600  | 0.47876300  | L H 27 | 0.0000 |  |
| H | 0 | 5.36429100   | 3.96772900  | -0.27532400 | L      |        |  |
| H | 0 | 6.77181300   | 3.28236000  | 0.53049400  | L      |        |  |
| H | 0 | 5.28659300   | 3.57303200  | 1.44843600  | L      |        |  |
| O | 0 | 1.00564100   | 4.18807100  | 0.62984100  | H      |        |  |
| H | 0 | -0.56646500  | 5.08860900  | 0.51692300  | H      |        |  |
| C | 0 | 0.44448800   | 1.80035200  | 2.09394000  | H      |        |  |
| H | 0 | -0.59463200  | 2.05054600  | 1.87301500  | H      |        |  |
| H | 0 | 0.83577400   | 2.54977300  | 2.78232300  | H      |        |  |
| H | 0 | 0.47207900   | 0.81638700  | 2.56689200  | H      |        |  |
| O | 0 | 0.96289000   | 0.66258800  | -0.02546700 | H      |        |  |
| O | 0 | -0.59396600  | 2.79092700  | -0.63596600 | H      |        |  |
| C | 0 | -0.35929400  | 0.45836800  | -0.32764600 | H      |        |  |
| C | 0 | -1.15087400  | 1.56958600  | -0.64790800 | H      |        |  |
| C | 0 | -2.49288700  | 1.38954900  | -0.96102400 | H      |        |  |
| H | 0 | -3.08523500  | 2.26684100  | -1.21003600 | H      |        |  |
| C | 0 | -3.05424900  | 0.11276000  | -0.98340300 | H      |        |  |
| C | 0 | -2.24090200  | -0.99787300 | -0.69636500 | H      |        |  |
| C | 0 | -0.87995700  | -0.83092900 | -0.33487400 | H      |        |  |
| C | 0 | 0.02630100   | -1.96800200 | 0.06737900  | H      |        |  |
| H | 0 | 0.28299600   | -2.58954900 | -0.79331000 | H      |        |  |
| H | 0 | -0.46917000  | -2.62348500 | 0.78430500  | H      |        |  |
| H | 0 | 0.94129000   | -1.56903500 | 0.50357900  | H      |        |  |
| C | 0 | -4.53383600  | -0.03042000 | -1.42630300 | H      |        |  |
| C | 0 | -2.84423700  | -2.34949800 | -0.75877200 | H      |        |  |
| O | 0 | -2.18073600  | -3.38366200 | -0.74017000 | H      |        |  |
| C | 0 | -4.30811300  | -2.44455300 | -0.80882300 | H      |        |  |
| H | 0 | -4.68018700  | -3.44958600 | -0.63522200 | H      |        |  |
| C | 0 | -5.12690300  | -1.41187700 | -1.06586700 | H      |        |  |
| C | 0 | -4.51254500  | 0.09963000  | -2.95176000 | L H 38 | 0.0000 |  |
| H | 0 | -3.98948800  | 1.00789700  | -3.27859600 | L      |        |  |
| H | 0 | -5.53207300  | 0.16006500  | -3.36824100 | L      |        |  |
| H | 0 | -4.01492000  | -0.75210200 | -3.43200500 | L      |        |  |
| H | 0 | -1.10318700  | 5.35567000  | -0.97794100 | H      |        |  |
| O | 0 | -1.38600100  | 4.98522000  | -0.02626100 | H      |        |  |
| H | 0 | -1.25837200  | 3.94279400  | -0.24383300 | H      |        |  |
| C | 0 | -5.35125900  | 1.10796700  | -0.79381200 | L H 38 | 0.0000 |  |
| H | 0 | -5.10727100  | 2.06814600  | -1.29588600 | L      |        |  |
| H | 0 | -5.03825500  | 1.24446600  | 0.26392700  | L      |        |  |
| C | 0 | -6.86560700  | 0.89866800  | -0.84433800 | L      |        |  |
| H | 0 | -7.36569800  | 1.73289800  | -0.30844100 | L      |        |  |
| H | 0 | -7.22557400  | 0.96681300  | -1.88983000 | L      |        |  |
| C | 0 | -6.64250200  | -1.60668400 | -1.07513800 | L H 43 | 0.0000 |  |
| C | 0 | -7.29454600  | -0.45352900 | -0.21925500 | L      |        |  |
| C | 0 | -8.84974400  | -0.58299900 | -0.28986500 | L      |        |  |
| H | 0 | -9.10535600  | -0.46457500 | -1.38030000 | L      |        |  |
| C | 0 | -9.41820300  | -1.97369800 | 0.12759300  | L      |        |  |
| C | 0 | -8.60083500  | -3.13584200 | -0.48888500 | L      |        |  |
| H | 0 | -8.86789300  | -4.08578400 | 0.01485400  | L      |        |  |
| H | 0 | -8.91512700  | -3.27606500 | -1.54535700 | L      |        |  |
| C | 0 | -7.08260200  | -2.95426700 | -0.44635700 | L      |        |  |
| H | 0 | -6.60712800  | -3.79855400 | -0.98545300 | L      |        |  |
| H | 0 | -6.72053800  | -3.02395000 | 0.59858200  | L      |        |  |
| C | 0 | -6.76451100  | -0.51860500 | 1.22327300  | L      |        |  |
| H | 0 | -7.16405100  | 0.30621800  | 1.83259100  | L      |        |  |
| H | 0 | -5.67225000  | -0.45062300 | 1.27129700  | L      |        |  |
| H | 0 | -7.04568800  | -1.45906900 | 1.72333200  | L      |        |  |
| C | 0 | -7.09129800  | -1.59884900 | -2.54931100 | L      |        |  |
| H | 0 | -6.90956100  | -0.62884300 | -3.03781000 | L      |        |  |
| H | 0 | -8.16476800  | -1.80667300 | -2.64892500 | L      |        |  |
| H | 0 | -6.56211700  | -2.36503500 | -3.12755800 | L      |        |  |
| C | 0 | -9.45831700  | -2.13229100 | 1.66682200  | L      |        |  |
| H | 0 | -8.41451000  | -2.19740300 | 2.06136800  | L      |        |  |
| H | 0 | -9.92758800  | -3.09835200 | 1.93961600  | L      |        |  |
| C | 0 | -9.70906300  | 0.40746600  | 1.96187900  | L      |        |  |
| H | 0 | -8.67438500  | 0.53229100  | 2.40146500  | L      |        |  |
| C | 0 | -9.59998300  | 0.55237200  | 0.43511900  | L      |        |  |
| H | 0 | -9.11245400  | 1.52500100  | 0.20741900  | L      |        |  |
| H | 0 | -10.61939800 | 0.63336700  | 0.00341100  | L      |        |  |
| C | 0 | -10.86558700 | -2.10055200 | -0.40182000 | L      |        |  |
| H | 0 | -10.91225000 | -1.98792500 | -1.49074100 | L      |        |  |
| H | 0 | -11.52958700 | -1.34198800 | 0.02592000  | L      |        |  |
| H | 0 | -11.29677700 | -3.07856800 | -0.16118200 | L      |        |  |

|   |   |              |             |             |   |      |        |
|---|---|--------------|-------------|-------------|---|------|--------|
| C | 0 | -10.61790200 | 1.48448000  | 2.54939700  | L |      |        |
| H | 0 | -10.22495800 | 2.48941500  | 2.35371900  | L |      |        |
| H | 0 | -10.71575900 | 1.37525800  | 3.63666000  | L |      |        |
| H | 0 | -11.62979600 | 1.44241900  | 2.12852100  | L |      |        |
| C | 0 | -10.16781800 | -0.99104000 | 2.34235800  | L |      |        |
| O | 0 | -11.02973400 | -1.19903000 | 3.18048900  | L |      |        |
| C | 0 | 7.24294200   | 0.80176400  | -1.05048300 | L |      |        |
| C | 0 | 5.81506000   | 1.33459600  | -1.18586300 | L | H 27 | 0.0000 |
| H | 0 | 5.81081100   | 2.16094800  | -1.92776800 | L |      |        |
| H | 0 | 5.17361300   | 0.54073100  | -1.62716900 | L |      |        |
| H | 0 | 7.94158500   | 1.63059100  | -0.82422000 | L |      |        |
| H | 0 | 7.56863500   | 0.40452200  | -2.03490100 | L |      |        |
| C | 0 | 7.11390300   | -0.77412400 | 2.49392700  | L |      |        |
| H | 0 | 6.41190600   | -1.60349000 | 2.27411800  | L |      |        |
| H | 0 | 6.81325800   | -0.38081500 | 3.48597500  | L |      |        |
| C | 0 | 8.54425600   | -1.30605600 | 2.58541300  | L |      |        |
| H | 0 | 8.58466900   | -2.11907100 | 3.33704700  | L |      |        |
| H | 0 | 9.19907100   | -0.50758500 | 2.99472900  | L |      |        |
| C | 0 | 8.84041700   | -0.82415400 | 0.07516600  | L |      |        |
| H | 0 | 9.47248600   | 0.08286900  | 0.27466100  | L |      |        |
| C | 0 | 6.98328800   | 0.33365900  | 1.41733000  | L | H 26 | 0.0000 |
| C | 0 | 7.36339100   | -0.30664100 | 0.02844700  | L |      |        |
| C | 0 | 7.90947200   | 1.49908000  | 1.81745700  | L |      |        |
| H | 0 | 7.59065600   | 1.94940700  | 2.76464300  | L |      |        |
| H | 0 | 7.92914300   | 2.29857600  | 1.06052000  | L |      |        |
| H | 0 | 8.94675700   | 1.16603100  | 1.95263000  | L |      |        |
| C | 0 | 6.38334000   | -1.44195900 | -0.31835600 | L |      |        |
| H | 0 | 5.35281400   | -1.08337500 | -0.42063800 | L |      |        |
| H | 0 | 6.36792400   | -2.22310100 | 0.45522700  | L |      |        |
| H | 0 | 6.65013200   | -1.92296200 | -1.26593300 | L |      |        |
| C | 0 | 8.58721900   | -3.22488500 | 0.95010100  | L |      |        |
| H | 0 | 7.50472600   | -3.26512500 | 1.21908500  | L |      |        |
| H | 0 | 9.06377000   | -3.97194400 | 1.62054600  | L |      |        |
| C | 0 | 9.28979000   | -1.37298700 | -1.30005000 | L |      |        |
| H | 0 | 10.15329900  | -0.77541400 | -1.65633800 | L |      |        |
| H | 0 | 8.49415800   | -1.19604900 | -2.05654600 | L |      |        |
| C | 0 | 9.68996200   | -2.85825900 | -1.34018700 | L |      |        |
| H | 0 | 10.71412600  | -2.95998700 | -0.87084700 | L |      |        |
| C | 0 | 9.14052800   | -1.81082000 | 1.24553400  | L |      |        |
| C | 0 | 10.67013300  | -1.89870500 | 1.45413000  | L |      |        |
| H | 0 | 11.11273400  | -0.91374900 | 1.63769300  | L |      |        |
| H | 0 | 11.18480000  | -2.32206000 | 0.57984400  | L |      |        |
| H | 0 | 10.92388000  | -2.53272200 | 2.31082700  | L |      |        |
| C | 0 | 8.74455300   | -3.67305600 | -0.47650400 | L |      |        |
| O | 0 | 8.14800800   | -4.65654900 | -0.88477600 | L |      |        |
| C | 0 | 9.75987200   | -3.37585200 | -2.77374000 | L |      |        |
| H | 0 | 8.78010100   | -3.35106800 | -3.26624400 | L |      |        |
| H | 0 | 10.11200900  | -4.41414400 | -2.80718500 | L |      |        |
| H | 0 | 10.44932500  | -2.77688900 | -3.38119600 | L |      |        |
| H | 0 | -0.12617500  | 6.29844600  | -2.47338400 | H |      |        |
| O | 0 | -0.56511300  | 5.45797700  | -2.29253000 | H |      |        |
| H | 0 | 0.14118100   | 4.75982400  | -2.32278400 | H |      |        |

Gibbs Free Energy= -1376.843553 Hartrees

## 2-wt-b pathway

### TS

|   |   |            |            |             |   |  |  |
|---|---|------------|------------|-------------|---|--|--|
| C | 0 | 2.64039300 | 2.81965200 | -0.72851700 | H |  |  |
| C | 0 | 0.53628600 | 2.35691700 | 0.52276500  | H |  |  |
| C | 0 | 2.74307000 | 1.77499200 | 1.48183500  | H |  |  |
| C | 0 | 1.27498700 | 1.77254700 | 1.60241900  | H |  |  |
| C | 0 | 3.37390200 | 2.23817300 | 0.25614800  | H |  |  |
| C | 0 | 1.21121200 | 2.99619900 | -0.64347900 | H |  |  |
| H | 0 | 3.10901400 | 3.21344400 | -1.62584000 | H |  |  |
| O | 0 | 0.56539800 | 3.68908000 | -1.43232600 | H |  |  |
| C | 0 | 3.50780400 | 1.18662500 | 2.43995800  | H |  |  |

|   |   |              |             |             |        |        |  |
|---|---|--------------|-------------|-------------|--------|--------|--|
| H | 0 | 3.03931200   | 0.81961700  | 3.34615000  | H      |        |  |
| C | 0 | 4.92092200   | 2.18584900  | 0.13009200  | H      |        |  |
| C | 0 | 5.59921800   | 1.27999000  | 1.18232900  | H      |        |  |
| C | 0 | 4.91007900   | 0.90747900  | 2.28236000  | H      |        |  |
| H | 0 | 5.37775800   | 0.33042900  | 3.07199500  | H      |        |  |
| C | 0 | 5.36422200   | 3.62989900  | 0.38784400  | L H 11 | 0.0000 |  |
| H | 0 | 4.83059400   | 4.34854000  | -0.24799700 | L      |        |  |
| H | 0 | 6.43728900   | 3.76755300  | 0.16965700  | L      |        |  |
| H | 0 | 5.20344100   | 3.93280700  | 1.43036500  | L      |        |  |
| O | 0 | -0.75331600  | 2.34489500  | 0.62628500  | H      |        |  |
| H | 0 | -1.22247700  | 2.50219000  | -0.29313900 | H      |        |  |
| C | 0 | 0.61107900   | 1.85769000  | 2.95271400  | H      |        |  |
| H | 0 | -0.42482000  | 1.52241800  | 2.87241300  | H      |        |  |
| H | 0 | 0.60988000   | 2.89779000  | 3.29006700  | H      |        |  |
| H | 0 | 1.12174400   | 1.25066900  | 3.69729800  | H      |        |  |
| O | 0 | 0.98485400   | -0.01336000 | 1.20251000  | H      |        |  |
| O | 0 | 0.21264000   | 0.48104500  | -1.27832200 | H      |        |  |
| C | 0 | -0.21107200  | -0.37650300 | 0.86901400  | H      |        |  |
| C | 0 | -0.59983500  | -0.11372800 | -0.51007500 | H      |        |  |
| C | 0 | -1.93166900  | -0.47015700 | -0.89122500 | H      |        |  |
| H | 0 | -2.21556300  | -0.29665600 | -1.92690400 | H      |        |  |
| C | 0 | -2.80153200  | -1.05510400 | -0.00972100 | H      |        |  |
| C | 0 | -2.39231500  | -1.31901300 | 1.34840400  | H      |        |  |
| C | 0 | -1.12239300  | -0.97539000 | 1.79839000  | H      |        |  |
| C | 0 | -0.60455400  | -1.27316800 | 3.18136800  | H      |        |  |
| H | 0 | -0.64107600  | -2.34546500 | 3.37727400  | H      |        |  |
| H | 0 | -1.22534700  | -0.80108100 | 3.94598600  | H      |        |  |
| H | 0 | 0.42185300   | -0.92201300 | 3.27120500  | H      |        |  |
| C | 0 | -4.18547600  | -1.53278100 | -0.53470600 | H      |        |  |
| C | 0 | -3.38359300  | -1.91977700 | 2.27732400  | H      |        |  |
| O | 0 | -3.08816800  | -2.34059700 | 3.39264400  | H      |        |  |
| C | 0 | -4.78885000  | -1.94549300 | 1.85974000  | H      |        |  |
| H | 0 | -5.47333100  | -2.18208400 | 2.66843900  | H      |        |  |
| C | 0 | -5.21368500  | -1.73385800 | 0.60371200  | H      |        |  |
| C | 0 | -3.91190400  | -2.89654000 | -1.17308900 | L H 38 | 0.0000 |  |
| H | 0 | -3.12020100  | -2.84389300 | -1.93226900 | L      |        |  |
| H | 0 | -4.80766600  | -3.29060000 | -1.68356800 | L      |        |  |
| H | 0 | -3.60409400  | -3.64756700 | -0.43462700 | L      |        |  |
| H | 0 | -1.35067900  | 3.25398500  | -2.01739600 | H      |        |  |
| O | 0 | -1.75849200  | 2.43616400  | -1.69055200 | H      |        |  |
| H | 0 | -1.13334500  | 1.74757600  | -1.99356200 | H      |        |  |
| C | 0 | -4.69217900  | -0.53096500 | -1.58415900 | L H 38 | 0.0000 |  |
| H | 0 | -4.10510300  | -0.64021900 | -2.52107600 | L      |        |  |
| H | 0 | -4.49525400  | 0.50529600  | -1.23261800 | L      |        |  |
| C | 0 | -6.17818800  | -0.66469200 | -1.91882600 | L      |        |  |
| H | 0 | -6.46329000  | 0.13583300  | -2.63415100 | L      |        |  |
| H | 0 | -6.36643700  | -1.61459200 | -2.45649300 | L      |        |  |
| C | 0 | -7.07104400  | -0.57727500 | -0.65506600 | L      |        |  |
| C | 0 | -6.70437700  | -1.79605800 | 0.27444200  | L H 43 | 0.0000 |  |
| C | 0 | -7.60489500  | -1.70219000 | 1.53345300  | L      |        |  |
| H | 0 | -7.40547800  | -0.75604300 | 2.07475200  | L      |        |  |
| H | 0 | -7.34997700  | -2.51321300 | 2.24591300  | L      |        |  |
| C | 0 | -9.09037700  | -1.80496000 | 1.18342100  | L      |        |  |
| H | 0 | -9.69044100  | -1.67929300 | 2.10634500  | L      |        |  |
| H | 0 | -9.30719900  | -2.83997600 | 0.84322900  | L      |        |  |
| C | 0 | -8.57119900  | -0.69023500 | -1.07580400 | L      |        |  |
| H | 0 | -8.64596300  | -1.66326300 | -1.63860300 | L      |        |  |
| C | 0 | -9.58287900  | -0.80822400 | 0.10483800  | L      |        |  |
| C | 0 | -9.85577300  | 0.56761000  | 0.75954700  | L      |        |  |
| H | 0 | -8.93818700  | 0.91292900  | 1.29681500  | L      |        |  |
| H | 0 | -10.62863400 | 0.46967500  | 1.54743600  | L      |        |  |
| C | 0 | -9.34659300  | 1.76743700  | -1.45464600 | L      |        |  |
| H | 0 | -8.38378000  | 2.22091200  | -1.07200300 | L      |        |  |
| C | 0 | -9.01891800  | 0.39805600  | -2.07169900 | L      |        |  |
| H | 0 | -9.90666500  | 0.02628300  | -2.62488300 | L      |        |  |
| H | 0 | -8.23432700  | 0.53878600  | -2.84647300 | L      |        |  |
| C | 0 | -10.92496500 | -1.34939900 | -0.44022000 | L      |        |  |
| H | 0 | -10.80327200 | -2.32100000 | -0.93194700 | L      |        |  |
| H | 0 | -11.37396800 | -0.67372600 | -1.17608800 | L      |        |  |
| H | 0 | -11.65886800 | -1.48537900 | 0.36169200  | L      |        |  |
| C | 0 | -9.94403000  | 2.70770300  | -2.49873100 | L      |        |  |
| H | 0 | -9.24599800  | 2.88210100  | -3.32619300 | L      |        |  |
| H | 0 | -10.18933100 | 3.68387800  | -2.06249000 | L      |        |  |
| H | 0 | -10.86949500 | 2.30665300  | -2.92993100 | L      |        |  |
| C | 0 | -10.25560700 | 1.61305800  | -0.24563900 | L      |        |  |
| O | 0 | -11.23249100 | 2.31948900  | -0.05904500 | L      |        |  |
| C | 0 | -6.76354600  | 0.74024900  | 0.07643900  | L      |        |  |
| H | 0 | -5.71930500  | 0.80617700  | 0.40040600  | L      |        |  |

|   |   |             |             |             |   |      |        |
|---|---|-------------|-------------|-------------|---|------|--------|
| H | 0 | -7.38241800 | 0.86417700  | 0.97958100  | L |      |        |
| H | 0 | -6.95589000 | 1.60972200  | -0.57021200 | L |      |        |
| C | 0 | -6.95057300 | -3.16389200 | -0.39275700 | L |      |        |
| H | 0 | -6.38665900 | -3.28082600 | -1.33133300 | L |      |        |
| H | 0 | -8.01016600 | -3.30956000 | -0.64070200 | L |      |        |
| H | 0 | -6.66081900 | -3.98618400 | 0.27143500  | L |      |        |
| C | 0 | 5.27154900  | 1.73295800  | -1.29299400 | L | H 11 | 0.0000 |
| H | 0 | 5.01673000  | 2.52994400  | -2.02081900 | L |      |        |
| H | 0 | 4.62205300  | 0.86197900  | -1.55714900 | L |      |        |
| C | 0 | 6.73766500  | 1.33797500  | -1.48008100 | L |      |        |
| H | 0 | 7.39001200  | 2.22883900  | -1.39847300 | L |      |        |
| H | 0 | 6.87764500  | 0.96556600  | -2.51675800 | L |      |        |
| C | 0 | 7.18828100  | 0.25042600  | -0.46896700 | L |      |        |
| C | 0 | 7.05123600  | 0.85776300  | 0.98035700  | L | H 12 | 0.0000 |
| C | 0 | 6.26697100  | -0.97255500 | -0.62230800 | L |      |        |
| H | 0 | 6.41797200  | -1.46682100 | -1.58768700 | L |      |        |
| H | 0 | 5.20325100  | -0.69587800 | -0.57212100 | L |      |        |
| H | 0 | 6.43809800  | -1.72053300 | 0.16382000  | L |      |        |
| C | 0 | 7.93130400  | 2.10369000  | 1.19967400  | L |      |        |
| H | 0 | 9.00092500  | 1.85783200  | 1.15981600  | L |      |        |
| H | 0 | 7.74301500  | 2.55296100  | 2.18178700  | L |      |        |
| H | 0 | 7.75741900  | 2.88047500  | 0.43889600  | L |      |        |
| C | 0 | 7.50687300  | -0.22904800 | 1.98795500  | L |      |        |
| H | 0 | 6.85487800  | -1.12244000 | 1.90474200  | L |      |        |
| H | 0 | 7.38685400  | 0.13778700  | 3.02703700  | L |      |        |
| C | 0 | 8.96732000  | -0.62500800 | 1.76763900  | L |      |        |
| H | 0 | 9.61775000  | 0.23415000  | 2.03812100  | L |      |        |
| H | 0 | 9.24121800  | -1.42582400 | 2.48247600  | L |      |        |
| C | 0 | 8.68395200  | -0.12468700 | -0.73867000 | L |      |        |
| H | 0 | 9.25800700  | 0.83710300  | -0.65625400 | L |      |        |
| C | 0 | 9.30727200  | -1.08062600 | 0.32472700  | L |      |        |
| C | 0 | 10.84792400 | -1.03757700 | 0.20237100  | L |      |        |
| H | 0 | 11.33069600 | -1.64371800 | 0.97675900  | L |      |        |
| H | 0 | 11.23521200 | -0.01773700 | 0.30064600  | L |      |        |
| H | 0 | 11.19756900 | -1.41975800 | -0.76713000 | L |      |        |
| C | 0 | 8.88967600  | -0.62880100 | -2.18693500 | L |      |        |
| H | 0 | 9.62560200  | 0.02948200  | -2.69154400 | L |      |        |
| H | 0 | 7.95106700  | -0.49825200 | -2.76901800 | L |      |        |
| C | 0 | 9.37078500  | -2.08284900 | -2.33726000 | L |      |        |
| H | 0 | 10.47655000 | -2.11323300 | -2.10119500 | L |      |        |
| C | 0 | 8.82409100  | -2.53735500 | 0.13074000  | L |      |        |
| H | 0 | 9.50194400  | -3.24092200 | 0.66028200  | L |      |        |
| H | 0 | 7.83874800  | -2.67511800 | 0.63534900  | L |      |        |
| O | 0 | 8.69458600  | -2.96582100 | -1.30444200 | L |      |        |
| C | 0 | 8.09246800  | -3.98784500 | -1.59269500 | L |      |        |
| C | 0 | 9.16438700  | -2.59214900 | -3.76064500 | L |      |        |
| H | 0 | 9.52795700  | -3.62110300 | -3.87276900 | L |      |        |
| H | 0 | 9.70216300  | -1.97191700 | -4.48792700 | L |      |        |
| H | 0 | 8.10575100  | -2.59156900 | -4.04768700 | L |      |        |
| H | 0 | 2.87934600  | -0.62558000 | 0.13272300  | H |      |        |
| O | 0 | 2.94886100  | -0.51483500 | -0.82369100 | H |      |        |
| H | 0 | 2.10202700  | -0.07717400 | -1.02052000 | H |      |        |

Gibbs Free Energy= -1376.807136 Hartrees

#### IV. Non-water HDA Case

##### TS

|   |   |             |             |            |   |  |  |
|---|---|-------------|-------------|------------|---|--|--|
| C | 0 | -2.41911600 | -0.44233500 | 2.48925300 | H |  |  |
| C | 0 | -0.45799500 | 0.98044200  | 1.93112500 | H |  |  |
| C | 0 | -2.70043400 | 1.73908700  | 1.38857900 | H |  |  |
| C | 0 | -1.25952900 | 2.04146200  | 1.44937600 | H |  |  |
| C | 0 | -3.23500900 | 0.49792500  | 1.94763700 | H |  |  |
| C | 0 | -0.98379500 | -0.25792400 | 2.53951300 | H |  |  |
| H | 0 | -2.80495700 | -1.35533100 | 2.93204200 | H |  |  |
| O | 0 | -0.17405500 | -1.01285300 | 3.08015300 | H |  |  |
| C | 0 | -3.53403200 | 2.57657300  | 0.71802000 | H |  |  |
| H | 0 | -3.12354500 | 3.47391600  | 0.26660800 | H |  |  |
| C | 0 | -4.77935800 | 0.35856600  | 2.05221700 | H |  |  |
| C | 0 | -5.54347200 | 1.22371900  | 1.02083900 | H |  |  |
| C | 0 | -4.92338300 | 2.28881800  | 0.47037500 | H |  |  |

|   |   |              |             |             |        |        |  |
|---|---|--------------|-------------|-------------|--------|--------|--|
| H | 0 | -5.44966700  | 2.96218300  | -0.19727200 | H      |        |  |
| C | 0 | -5.09651300  | 0.91544400  | 3.44623400  | L H 11 | 0.0000 |  |
| H | 0 | -4.51925700  | 0.41088300  | 4.23204300  | L      |        |  |
| H | 0 | -6.16123300  | 0.77527900  | 3.70080400  | L      |        |  |
| H | 0 | -4.88439200  | 1.98960900  | 3.52243700  | L      |        |  |
| C | 0 | -5.16205500  | -1.12577000 | 1.95926700  | L H 11 | 0.0000 |  |
| H | 0 | -4.87576700  | -1.64710800 | 2.89726100  | L      |        |  |
| H | 0 | -4.56340700  | -1.61284700 | 1.15889500  | L      |        |  |
| C | 0 | -6.64627200  | -1.37945500 | 1.69051400  | L      |        |  |
| H | 0 | -7.24834600  | -1.09966100 | 2.57708700  | L      |        |  |
| H | 0 | -6.81009400  | -2.47024800 | 1.55973800  | L      |        |  |
| C | 0 | -7.00717200  | 0.92201200  | 0.71760600  | L H 12 | 0.0000 |  |
| C | 0 | -7.15552100  | -0.62248700 | 0.43717400  | L      |        |  |
| C | 0 | -7.52766700  | 1.67330300  | -0.53494400 | L      |        |  |
| H | 0 | -7.39690800  | 2.76700200  | -0.40564100 | L      |        |  |
| H | 0 | -6.92058500  | 1.40292100  | -1.42157800 | L      |        |  |
| C | 0 | -8.66473200  | -0.95776900 | 0.21234000  | L      |        |  |
| H | 0 | -9.17470900  | -0.67737800 | 1.17688900  | L      |        |  |
| C | 0 | -9.37138800  | -0.11936000 | -0.89627600 | L      |        |  |
| C | 0 | -9.00549100  | 1.38264800  | -0.80106400 | L      |        |  |
| H | 0 | -9.61369000  | 1.85172800  | 0.00130500  | L      |        |  |
| H | 0 | -9.31615500  | 1.89984200  | -1.73045300 | L      |        |  |
| C | 0 | -7.82229000  | 1.39706000  | 1.93708500  | L      |        |  |
| H | 0 | -7.53966200  | 0.86980500  | 2.86159000  | L      |        |  |
| H | 0 | -8.89837700  | 1.23281300  | 1.79547300  | L      |        |  |
| H | 0 | -7.68087700  | 2.46964300  | 2.11343600  | L      |        |  |
| C | 0 | -6.28148300  | -1.01523400 | -0.76580100 | L      |        |  |
| H | 0 | -5.22776600  | -0.75374800 | -0.62110400 | L      |        |  |
| H | 0 | -6.60671100  | -0.51504800 | -1.69197100 | L      |        |  |
| H | 0 | -6.32119200  | -2.09934000 | -0.95082400 | L      |        |  |
| C | 0 | -9.02662500  | -0.64399600 | -2.31101400 | L      |        |  |
| H | 0 | -7.95037100  | -0.43799100 | -2.53262400 | L      |        |  |
| H | 0 | -9.58960500  | -0.07572800 | -3.07747800 | L      |        |  |
| C | 0 | -8.94342400  | -2.46207400 | 0.01996200  | L      |        |  |
| H | 0 | -8.34540600  | -3.04729700 | 0.75178800  | L      |        |  |
| H | 0 | -10.00189900 | -2.66148600 | 0.28847400  | L      |        |  |
| C | 0 | -8.66758300  | -3.01472600 | -1.38808700 | L      |        |  |
| C | 0 | -9.28223600  | -2.11951700 | -2.45193900 | L      |        |  |
| C | 0 | -10.90199800 | -0.23077300 | -0.70678900 | L      |        |  |
| H | 0 | -11.21621800 | 0.11777500  | 0.28337200  | L      |        |  |
| H | 0 | -11.25657700 | -1.26201400 | -0.80812100 | L      |        |  |
| H | 0 | -11.44273800 | 0.37011900  | -1.44624200 | L      |        |  |
| C | 0 | -9.15037800  | -4.45794000 | -1.51380400 | L      |        |  |
| H | 0 | -8.64238600  | -5.11319900 | -0.79625000 | L      |        |  |
| H | 0 | -8.95888500  | -4.85593500 | -2.51822300 | L      |        |  |
| H | 0 | -10.22838500 | -4.54709800 | -1.33244700 | L      |        |  |
| O | 0 | 0.84329800   | 1.17070000  | 2.02282500  | H      |        |  |
| H | 0 | 1.20871100   | 0.34887300  | 2.41651400  | H      |        |  |
| C | 0 | -0.79917500  | 3.44852500  | 1.75597500  | H      |        |  |
| H | 0 | 0.27174800   | 3.54241000  | 1.56819700  | H      |        |  |
| H | 0 | -0.99464500  | 3.67138800  | 2.80882600  | H      |        |  |
| H | 0 | -1.32824500  | 4.17716000  | 1.14227800  | H      |        |  |
| H | 0 | -7.55022400  | -2.99349700 | -1.56169700 | L      |        |  |
| O | 0 | -9.91331700  | -2.55678400 | -3.40001700 | L      |        |  |
| O | 0 | -0.78408900  | 2.14046200  | -0.39871200 | H      |        |  |
| C | 0 | -0.47855700  | -0.36238400 | 0.10446100  | H      |        |  |
| O | 0 | 0.35160100   | 1.63386700  | -0.70851600 | H      |        |  |
| C | 0 | 0.49844600   | 0.20971700  | -0.44789500 | H      |        |  |
| C | 0 | 1.77302900   | -0.39589300 | -0.68455800 | H      |        |  |
| H | 0 | 1.86698100   | -1.45786700 | -0.47100900 | H      |        |  |
| C | 0 | 2.80712400   | 0.32741500  | -1.21472500 | H      |        |  |
| C | 0 | 2.63515400   | 1.73569500  | -1.49196200 | H      |        |  |
| C | 0 | 1.45850600   | 2.40834600  | -1.19148700 | H      |        |  |
| C | 0 | 1.22924100   | 3.88331600  | -1.38597800 | H      |        |  |
| H | 0 | 1.19270600   | 4.13771600  | -2.44722800 | H      |        |  |
| H | 0 | 2.04615700   | 4.46582200  | -0.95704300 | H      |        |  |
| H | 0 | 0.28568500   | 4.16366700  | -0.91852400 | H      |        |  |
| C | 0 | 4.12663400   | -0.40989500 | -1.58344600 | H      |        |  |
| C | 0 | 3.78909500   | 2.48043600  | -2.06501600 | H      |        |  |
| O | 0 | 3.67751500   | 3.60260200  | -2.54916100 | H      |        |  |
| C | 0 | 5.11280700   | 1.85763800  | -1.99418100 | H      |        |  |
| H | 0 | 5.92569900   | 2.54632800  | -2.20245900 | H      |        |  |
| C | 0 | 5.32567200   | 0.55694300  | -1.73463400 | H      |        |  |
| C | 0 | 4.40133000   | -1.48501400 | -0.51965300 | L H 81 | 0.0000 |  |
| H | 0 | 3.69344400   | -2.33114300 | -0.65076100 | L      |        |  |
| H | 0 | 4.18144200   | -1.07294900 | 0.48956000  | L      |        |  |
| C | 0 | 6.75028700   | 0.00644200  | -1.68630000 | L H 86 | 0.0000 |  |
| C | 0 | 5.82799500   | -2.03547300 | -0.52718100 | L      |        |  |

|   |   |             |             |             |               |
|---|---|-------------|-------------|-------------|---------------|
| H | 0 | 6.00211900  | -2.63612200 | -1.44147200 | L             |
| H | 0 | 5.94645600  | -2.74842400 | 0.31638300  | L             |
| C | 0 | 6.89024700  | -0.91257600 | -0.41334300 | L             |
| C | 0 | 3.85848500  | -1.04968900 | -2.94708000 | L H 81 0.0000 |
| H | 0 | 2.95459600  | -1.67341900 | -2.93745000 | L             |
| H | 0 | 4.68806200  | -1.70865400 | -3.25581500 | L             |
| H | 0 | 3.72684300  | -0.30173400 | -3.73902300 | L             |
| C | 0 | 7.82370300  | 1.11996800  | -1.57325700 | L             |
| H | 0 | 7.64887200  | 1.72677700  | -0.66260600 | L             |
| H | 0 | 7.73274900  | 1.82485700  | -2.42478000 | L             |
| C | 0 | 8.31526500  | -1.55262500 | -0.39814000 | L             |
| H | 0 | 8.37092300  | -2.16787300 | -1.33999600 | L             |
| C | 0 | 9.24172200  | 0.54710000  | -1.55899500 | L             |
| H | 0 | 9.46839800  | 0.12508000  | -2.56132500 | L             |
| H | 0 | 9.96703700  | 1.37459400  | -1.42975300 | L             |
| C | 0 | 9.49777400  | -0.54013100 | -0.48612300 | L             |
| C | 0 | 6.98088600  | -0.74931700 | -3.00969700 | L             |
| H | 0 | 6.29903100  | -1.60575300 | -3.12911100 | L             |
| H | 0 | 8.00209900  | -1.14704000 | -3.07712300 | L             |
| H | 0 | 6.83697500  | -0.08928900 | -3.87285300 | L             |
| C | 0 | 6.60371100  | -0.08689100 | 0.85214200  | L             |
| H | 0 | 6.64076600  | -0.71478000 | 1.75524500  | L             |
| H | 0 | 5.61506000  | 0.38423400  | 0.83130300  | L             |
| H | 0 | 7.33699600  | 0.72388000  | 0.98973600  | L             |
| C | 0 | 9.76825800  | 0.13726000  | 0.87890100  | L             |
| H | 0 | 8.91740900  | 0.81684600  | 1.13223800  | L             |
| H | 0 | 10.65265300 | 0.80059700  | 0.80751000  | L             |
| C | 0 | 8.53487800  | -2.54770900 | 0.75897900  | L             |
| H | 0 | 7.63482100  | -3.19018900 | 0.87239700  | L             |
| H | 0 | 9.35186700  | -3.24348200 | 0.47491000  | L             |
| C | 0 | 9.94405100  | -0.86086400 | 1.99060600  | L             |
| C | 0 | 8.86056000  | -1.91913200 | 2.12381800  | L             |
| H | 0 | 7.93655300  | -1.38127800 | 2.49287200  | L             |
| C | 0 | 10.77763900 | -1.30164400 | -0.90172200 | L             |
| H | 0 | 11.06385900 | -2.06032500 | -0.16536900 | L             |
| H | 0 | 11.63075000 | -0.62332500 | -1.01259700 | L             |
| H | 0 | 10.65176400 | -1.81823400 | -1.85978000 | L             |
| O | 0 | 10.88623200 | -0.77845500 | 2.76115900  | L             |
| C | 0 | 9.23617700  | -2.99211800 | 3.14328600  | L             |
| H | 0 | 8.41926000  | -3.70923600 | 3.28810200  | L             |
| H | 0 | 9.46440900  | -2.55140900 | 4.12153100  | L             |
| H | 0 | 10.12085400 | -3.56096200 | 2.83223500  | L             |

Gibbs Free Energy= -1224.032472 Hartrees
